# Rapid weed adaptation and range expansion in response to agriculture over the last two centuries

Short title: Weed adaptation to modern agriculture

Julia Kreiner<sup>\*1,2</sup>, Sergio M. Latorre<sup>3,4</sup>, Hernán A. Burbano<sup>3,4</sup>, John R. Stinchcombe<sup>5</sup>, Sarah P. Otto<sup>2,6</sup>, Detlef Weigel<sup>4</sup>, & Stephen Wright<sup>5</sup>

## Affiliations:

<sup>1</sup>*Department of Botany, University of British Columbia, Vancouver, Canada;*

<sup>2</sup>*Biodiversity Research Centre, University of British Columbia, Vancouver, Canada;*

<sup>3</sup>*Centre for Life's Origins and Evolution, Department of Genetics, Evolution and Environment, University College London, London, UK;*

<sup>4</sup>*Department of Molecular Biology, Max Planck Institute for Biology Tübingen, Tübingen, Germany;*

<sup>5</sup>*Department of Ecology and Evolutionary Biology, University of Toronto, Toronto, ON, Canada;*

<sup>6</sup>*Department of Zoology, University of British Columbia, Vancouver, Canada;*

\*Corresponding author email: [julia.kreiner@ubc.ca](mailto:julia.kreiner@ubc.ca)

## Abstract

North America has seen a massive increase in cropland use since 1800, accompanied more recently by the intensification of agricultural practices. Through genome analysis of present-day and historical samples spanning environments over the last two centuries, we studied the impact of these changes in farming on the extent and tempo of evolution in the native common waterhemp (*Amaranthus tuberculatus*), a now pervasive agricultural weed. Modern agriculture has imposed strengths of selection rarely observed in the wild, with striking shifts in allele frequency trajectories since agricultural intensification in the 1960s. An evolutionary response to this extreme selection was facilitated by a concurrent human-mediated range shift. By reshaping genome-wide diversity and variation for fitness, agriculture has driven the success of this weed in the 21<sup>st</sup>-century.

## One Sentence Summary

Modern agriculture has dramatically shaped the evolution of a native plant into an agricultural weed through imposing strengths of selection rarely observed in the wild.

## Main text

Agricultural practices across North America have rapidly intensified over the last two centuries, through cropland expansion (1), habitat homogenization (2), and increased chemical inputs (3, 4). Since the beginning of the 1800s, cropland usage has expanded from 8 million to 200 million hectares in Canada and the United States alone (1). Since the mid 1900's, development of new crop varieties—including high-yield and herbicide-resistant wheat, corn, and soy (5, 6)—have greatly improved the efficiency of food production in all farming sectors. Combined with increased reliance on pesticides, fertilizers, irrigation, and large-scale mechanization, this transformation is oft-referenced as the agricultural “Green Revolution” (7–9). For pesticides, however, their effectiveness has been limited by the evolution of resistance across numerous pest species (10–13). While technological innovation for efficient food production has risen with increasing global food demands, the concomitant conversion of our landscape has become one of the foremost drivers of global biodiversity loss (14).

Species that have managed to survive, and even thrive, in the face of such extreme environmental change provide remarkable examples of rapid adaptation on contemporary timescales and illustrate the evolutionary consequences of anthropogenic impacts. One such species is common waterhemp (*Amaranthus tuberculatus*), which is native to North America and persists in large part in natural, riparian habitats (15, 16), providing a unique opportunity to investigate the timescale and extent of contemporary agricultural adaptation in this prevalent weed. The genetic changes underlying weediness are particularly important to understand in *A. tuberculatus*, as it has recently become one of the most problematic agricultural weeds in North America due to widespread adaptation to herbicides, persistence in fields across seasons, and strong competitive ability with both soy and corn (17, 18). Determining how much of waterhemp's success in agricultural environments has been driven by either newly arisen mutations, genetic variants predating the onset of environmental change (19, 20), or migration across the range (21), as well as their interactions (e.g. (22, 23)), will inform on the temporal and spatial scales at which contemporary adaptation occurs and management strategies should be employed.

To understand how changing agricultural practices have shaped the success of a ubiquitous weed, we analyze genomic data from contemporary paired natural and agricultural populations alongside historical herbarium samples collected from 1828 until 2011 (**Fig 1**). With this design, we identify agriculturally adaptive alleles—those that are consistently higher in frequency in agricultural than in geographically close natural sites which constitute contrasts in selective pressures, track their frequency across nearly two centuries, and link the tempo of weed adaptation to demographic changes and key cultural shifts in modern agriculture.

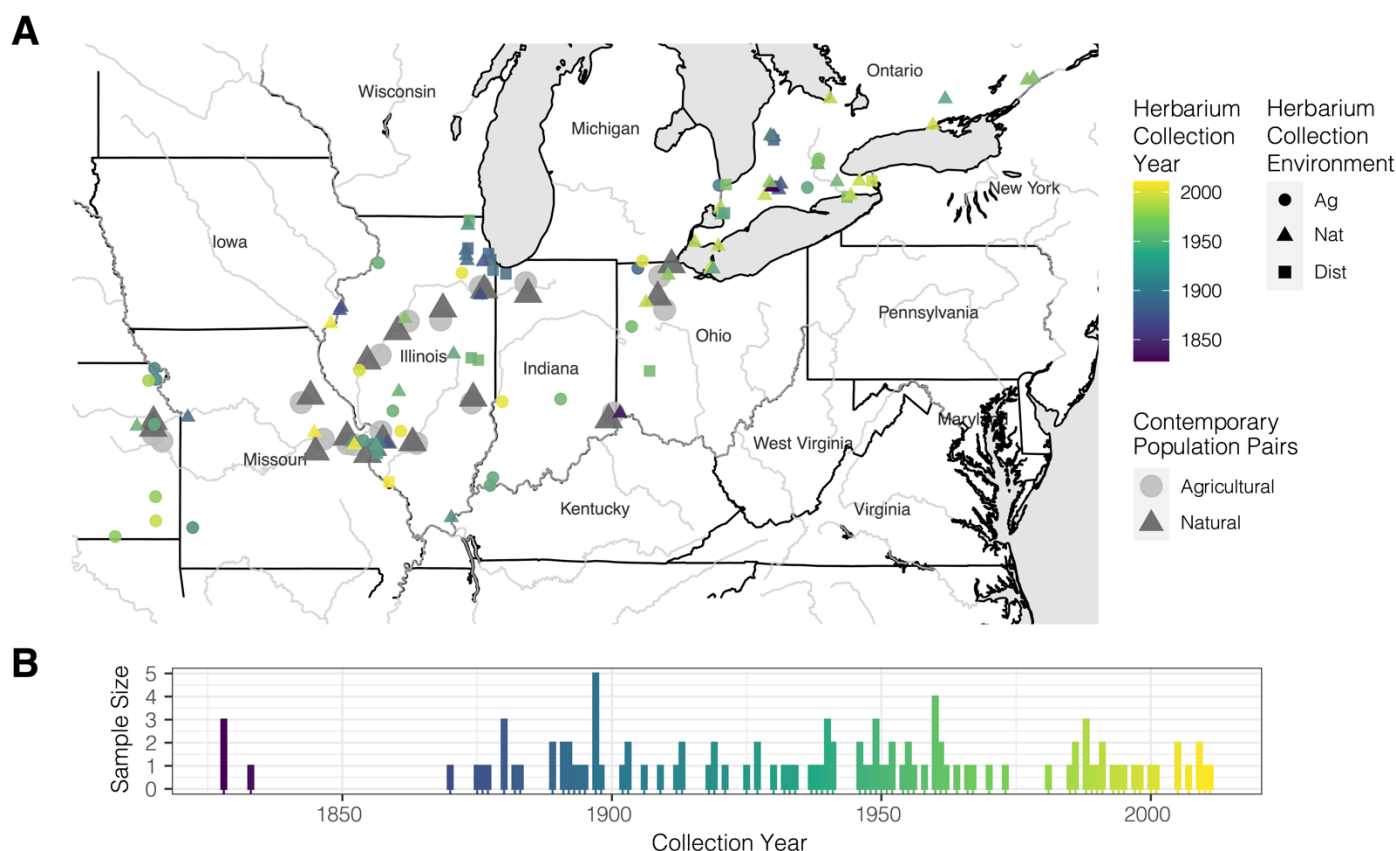

**Fig 1. Sequenced waterhemp collections through space and time. A)** Map of 17 contemporary paired natural-agricultural populations [ $n=187$ , collected and sequenced in Kreiner et al., 2021 (24)], along with 108 novel sequenced herbarium specimens dating back to 1828 collected across three environment types (Ag=Agricultural, Nat=Natural, Dist=Disturbed). **B)** Distribution of sequenced herbarium samples through time.

### *The genome-wide signatures of agricultural adaptation*

To find alleles favored under current farming practices, we looked for those alleles that were consistently overrepresented in extant populations collected in agricultural habitats compared to neighboring riparian (“natural”) habitats (24) using Cochran–Mantel–Haenszel (CMH) tests (**Fig 2A**). Alleles associated with agricultural environments (the 0.1% of SNPs with lowest CMH p-values;  $n=7264$ ) are significantly enriched for 29 GO-biological process terms related to growth and development, reproduction, cellular metabolic processes, and responses to abiotic, endogenous and external stimuli, including response to chemicals (**Table S1**). The importance of chemical inputs in shaping weed agricultural adaptation is clear in that the most significant agriculturally associated SNP (raw p-value =  $8.551 \times 10^{-11}$ , [FDR corrected] q-value = 0.00062) falls just 80 kb outside the gene protoporphyrinogen oxidase (*PPO*)—the target of PPO-inhibiting herbicides (**Fig 2B**). PPO herbicides were widely used in the 1990s, but have seen a recent resurgence to control and slow the spread of glyphosate resistant weeds (25, 26). Other

genes with the strongest agricultural associations include *ACO1*, which has been shown to confer oxidative stress tolerance (27); *HB13*, involved in pollen viability (28) as well as drought and salt tolerance (29); *PME3*, involved in growth via germination timing (30); *CAM1*, a regulator of senescence in response to stress (31, 32); and both *CRY2* and *CPD*, two key regulators of photomorphogenesis and flowering via brassinosteroid signaling (33–36) (**Table S2**). Natural-vs-agricultural  $F_{ST}$  (allele frequency differentiation) is highly correlated with the CMH test statistic (Pearson's  $r = 0.987$ ), with 78% [98%] of CMH focal SNPs overlapping with the top 0.01% [0.1%] of  $F_{ST}$  hits (**Fig S1**). Despite negligible genome-wide differentiation ( $F_{ST} = 0.0008$ ; with even lower mean  $F_{ST}$  between paired sites = -0.0029; **Fig 2C**) and thus widespread gene flow among environments, our results suggest that strong antagonistic selection acts to maintain spatial differentiation for some alleles—403 SNPs with a CMH q-value < 0.10.

To further investigate the extent to which herbicides shape adaptation to agriculture, we assayed patterns of environmental differentiation at known resistance variants. Eight such alleles were present in contemporary samples, only six of which were common (**Table S3**): a deletion of codon 210 within *PPO* (37), a copy number amplification and a non-synonymous mutation within 5-enolpyruvylshikimate-3-phosphate synthase (*EPSPS*) conferring resistance to glyphosate herbicides (38), and 3 separate non-synonymous mutations within acetolactate synthase (*ALS*) conferring resistance to ALS-inhibiting herbicides (18). While these resistance alleles were at intermediate frequency in agricultural populations, ranging from 0.08 to 0.35, they tended to be rarer but still frequent in natural populations, ranging from 0.04 to 0.22. Three out of six common resistance alleles showed significant allele frequency differences among environments (*EPSPS*amp:  $F = 8.74$ ,  $p = 0.006$ ; *PPO*210:  $F = 40.98$ ;  $p = 1.25e-09$ ; *ALS*574:  $F = 6.28$ ;  $p = 0.013$ ), two of which showed some of the strongest signals of differentiation genome-wide. Natural-vs-agricultural  $F_{ST}$  at the *PPO*210 deletion, 0.21, is higher than anywhere else in the genome and is even stronger when calculated within population pairs ( $F_{ST} = 0.27$ ) (**Fig 2C**). Similarly, the *EPSPS* amplification is ranked 20th among genome-wide biallelic  $F_{ST}$  values, 0.14 (within-pair  $F_{ST} = 0.22$ ), in support of herbicides as a foremost driver of agricultural adaptation (**Fig 2D**).

To infer the importance of selective trade-offs in adaptation across natural and agricultural environments, we implemented a Wright-Fisher allele-frequency-based migration-selection balance model for these three differentiated resistance alleles, as well as the top 30 independent CMH outliers. Assuming these alleles are at a steady-state between migration and selection, we inferred that the costs of resistance per migrant that has arrived into natural environments are consistently higher than the benefits of resistance per migrant that has arrived into agricultural environments (per-migrant cost: benefit ratio ranges from 1.38 for *EPSPS*amp and 1.44 for *ALS*574, to 5.02 for the *PPO*210 deletion; **Fig 2D**, **Table S3**). Thus, the spread of these three common herbicide resistance alleles appears to be constrained either by more consistent selection against resistance in herbicide-free, natural environments, or by particularly high rates of

migration of susceptible alleles from natural into agricultural environments. In comparison, for the top 30 independent CMH outliers, the costs per migrant that has arrived in natural environments were about equally likely to be stronger or weaker (12/28, 42%) than the benefits per migrant in agricultural environments (**Fig S2**). Although further work is necessary to understand the contributions of temporal and spatial heterogeneity in both migration and selection for and against resistance across the landscape, these first results suggest that costs of resistance in the absence of herbicides may play an important role.

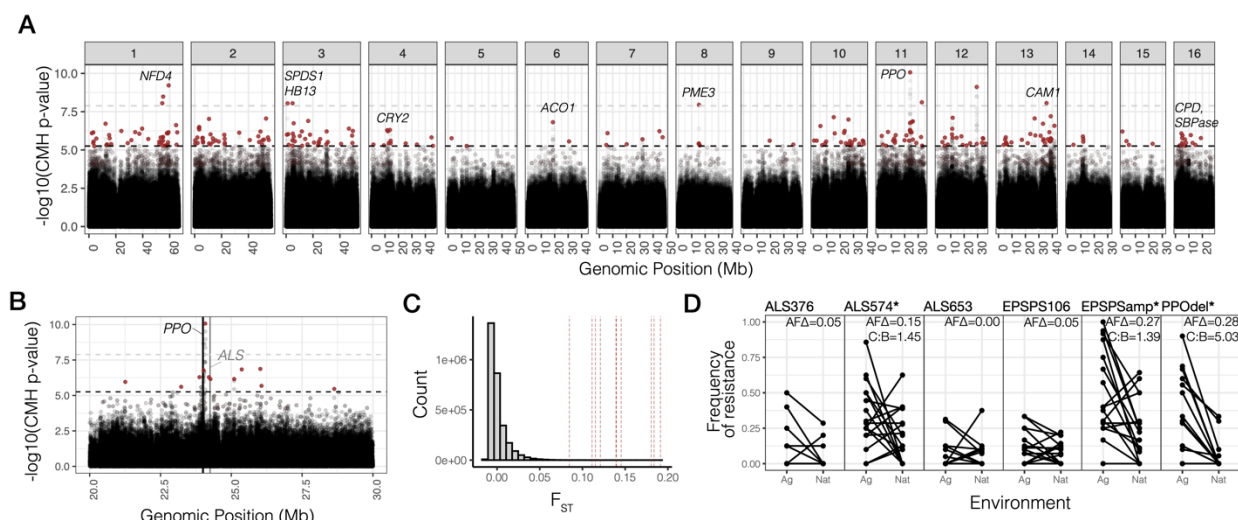

**Fig 2. Signals of contemporary agricultural adaptation, gene flow, and antagonistic selection across the genome in *A. tuberculatus*.** **A)** Results from Cochran–Mantel–Haenszel (CMH) tests for SNPs with consistent differentiation among environments across contemporary natural-agricultural population pairs. A 10% FDR threshold is indicated by the lower dashed horizontal black line, while the Bonferroni corrected p-value < 0.1 cutoff is shown by the upper dashed horizontal gray line. Red points indicate focal adaptive SNPs after aggregating linked variation ( $r^2 > 0.25$  within 1 Mb). Candidate agriculturally adaptive genes for peaks that are significant at a 10% FDR threshold shown. **B)** CMH results from the scaffold containing the most significant CMH p-value, corresponding to variants linked to the PPO210 deletion conferring herbicide resistance and to the nearby herbicide-targeted gene *ALS*. **C)** Distribution of  $F_{ST}$  values between all agricultural and natural samples for ~3 million genome-wide SNPs (minor allele frequency > 0.05). Vertical lines indicate  $F_{ST}$  values for the 10 candidate genes named in **A**. **D)** Population-level frequencies of six common herbicide resistance alleles across geographically paired agricultural and natural habitats sampled in 2018 (pairs connected by horizontal lines). The first four columns are nonsynonymous variants in *ALS* and *EPSPS*, followed by EPSPSamp (a 10 Mb-scale amplification that includes *EPSPS*), and lastly, an in-frame single-codon deletion in *PPO*. Estimates of per-migrant natural cost: agricultural benefit ratio (C:B) is shown in the top right corner for the three resistance alleles with a significant (\*) allele frequencies differences (AFA) across environment types.



## *Agriculturally-adaptive alleles change rapidly with intensified regimes*

With a genome-wide set of agriculture-associated alleles (251 loci after aggregating linked SNPs), we searched for signatures of temporal evolution using newly collected whole genome sequence data from a set of historical herbarium samples ( $n=108$ ) dating back to 1828. These samples provide snapshots of the genetic changes that have occurred over this time period and across environment types, with collections from natural and weedy (agricultural and disturbed) habitats (**Fig 1**). Of the 165 loci for which we had sufficient information in the historical SNP set (sequenced to 10x coverage on average), 151 were segregating with the same reference/alternate allele combination (i.e. 11 were dropped due to multi-allelism), and only three were invariant. To model allele frequency change through time at these alleles, we implemented logistic regressions of genotypes (within individual allele frequencies) at each locus on collection year, where  $2 \times \text{slope}$  of the logit-transform is equivalent to the strength of selection ( $s$ ) in a diploid model of selection (where  $s$  is the fitness difference between homozygotes, assuming additivity; see *Methods* for model and simulations (39)).

Consistent with the rapid change in land use and farming practices in the recent past, the frequency of these 154 contemporary agricultural alleles has increased substantially over the last two centuries. Whereas in natural environments agriculturally-adaptive alleles have increased by 6% on average since 1870, the earliest time point at which we have collections across environment types, these same alleles have increased by 22% in disturbed and agricultural environments (**Fig 3A**). This observed change greatly exceeds the expected change over this time period, based on genome-wide patterns that reflect drift, migration, selection, and demographic change (null 95% interquantile range for allele frequency change in agricultural and disturbed sites = [3.3, 7.9%]; for change in natural sites = [-2.7, 2.0.%]). We generated these null expectations by randomly sampling a set of 154 loci with the same distribution of contemporary allele frequencies (**Fig S4**) and calculating their frequency change through time across herbarium samples, separately in each environment, 1000 times (see *Methods* (39)). That the observed change in natural environments is also more extreme than what is expected is consistent with ongoing migration of agriculturally-selected alleles and subsequent costs in natural environments.

The considerable increase in frequency of these alleles across environments corresponds to remarkably strong selection even when estimated over century-long time periods. The 154 agriculture-associated alleles collectively exhibit a selective strength of  $\tilde{s} = 0.022$  since the 1870s in agricultural and disturbed habitats but exhibit much weaker selection,  $\tilde{s} = 0.0056$ , in natural habitats (agricultural and disturbed null interquantile range = [0.0026, 0.0068]; natural null interquantile range = [-0.0018, 0.0018]). An open question in evolutionary biology is what distribution of selection coefficients underlie adaptation (40). We estimate that selection on agricultural-associated loci varies between -0.196 and 0.150 in natural habitats, and -0.090 and 0.372 in agricultural and disturbed habitats,

reflective of left and right skewed distributions respectively (**Fig 3B, Fig S5**). The top 15 agriculture-associated alleles that we infer have experienced the strongest, significant selection over the last ~150 years include SNPs that map near *PPO*, *ACO1*, *CCB2*, *WRKY13*, *BPL3*, and *ATPD* (**Table S4**). We find that both the total frequency change of agriculture-associated alleles and the estimated strength of selection in agricultural and disturbed environments are positively correlated with the extent of contemporary linkage disequilibrium around these loci (the number of SNPs with  $r^2 > 0.25$  within 1Mb) (frequency change:  $F = 5.16$ ,  $p = 0.024$ ,  $r = 0.12$ ; strength of selection:  $F = 3.99$ ,  $p = 0.048$ ,  $r = 0.058$ ; **Fig S6**), consistent with theoretical expectations for the genomic signatures of recent positive selection (41, 42).

We next asked how well the trajectory of modern agricultural alleles mimic the rise of industrialized agricultural regimes across the last century. When we split out samples into those that predate versus those that come after the intensification of agriculture during the Green Revolution, we find that the increase in frequency of agricultural alleles was negligible in agricultural and disturbed environments before the 1960s (predicted 1870-1960 change = 0.005). In contrast, change subsequent to 1960 nearly completely accounts for the observed rise in frequency of modern agricultural alleles (predicted 1960-2018 change = 0.219, versus total 1870-2018 change = 0.221) (**Fig 3C**). Corresponding estimates of selection by logistic regression using only data from before 1960 shows no evidence of selection on these loci in disturbed and agricultural habitats ( $\tilde{s} = 0.0008$ , null interquantile range = [-0.0044, 0.0020]) or in natural habitats ( $\tilde{s} = 0.0006$ , null interquantile range = [-0.004, 0.004]). However, samples collected after 1960 reflect a dramatic shift in selection—a collective  $\tilde{s} = 0.054$  in disturbed and agricultural environments and a collective  $\tilde{s} = 0.028$  in natural environments (agricultural/disturbed null interquantile range = [0.0064, 0.0020]; natural null interquantile range = [-0.0056, 0.0054]) (**Fig 3C; Fig S8**). Together, these results suggest that while most contemporary agricultural alleles were present in historical populations, these alleles only became associated with agricultural and human-managed sites over the last century, on timescales and rates consistent with the rapid uptake and intensification of agrochemicals, controlled irrigation, and mechanization in agriculture.

The historical trajectory of known herbicide resistance alleles epitomizes extreme selection over the last 50 years (**Fig 3D**). Five out of seven known biallelic herbicide resistance alleles present in our contemporary, paired-environment collections are absent from our historical samples, consistent with the suggested importance of resistance adaptation from *de novo* mutation (12, 43) and a particularly recent increase in their frequency. Only three out of 108 historical samples show variation for herbicide resistance, two samples homozygous for resistance at ALS574 and one heterozygous for resistance at ALS122—all of which were sampled after the onset of herbicide applications in the 1960s (**Fig 3D**). Resolving the very low historical and much higher contemporary frequencies of resistance, we estimate that since the approximate onset of herbicide use in 1960, these seven resistance alleles have collectively experienced a



selective strength of  $\tilde{s} = 0.198$  ( $Z = 2.11$ ,  $p = 0.035$ ) per year. Independently estimated selective strengths are significant for five of the seven resistance alleles, strongest for PPO210 ( $s > 0.194$ ), EPSPS106 ( $s > 0.106$ ), and for ALS574 ( $s > 0.088$ ) (Fig 3D; Table S3). As expected, selection has been particularly strong on these alleles collectively in agricultural environments ( $\tilde{s} = 0.200$ ,  $Z = 2.121$ ,  $p = 0.034$ ), with no significant evidence of selection on resistance alleles in any other distinct habitat type.

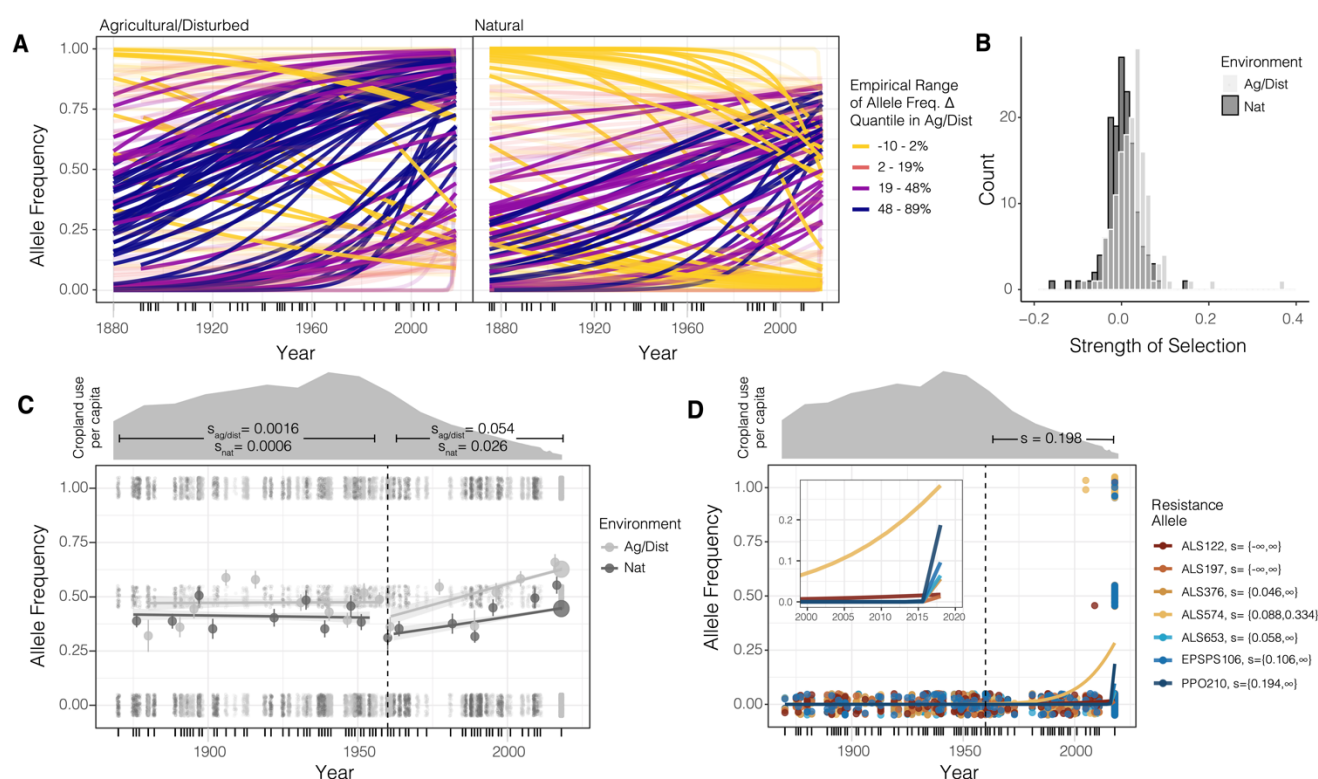

**Fig 3. Genomic signatures of agricultural adaptation through time.** **A)** Agricultural allele frequency trajectories for each 154 focal SNPs, in agricultural and disturbed habitats (left), and natural habitats (right). Trajectories colored by the empirical quantile of frequency change in agricultural and disturbed habitats. Transparent lines indicate those with non-significant evidence of selection at  $\alpha=0.05$  after FDR=10% correction. **B)** The distribution of selective strengths on agricultural alleles in natural (dark gray) and agricultural/disturbed (light gray) habitats between 1870 and 2018. **C)** Environment-specific agricultural allele frequency trajectories, before and after the start of agricultural intensification in 1960 (vertical dashed line). Large circles represent moving averages (over both loci and individuals) of allele frequencies, whereas dots represent raw genotype data for each locus and sample from which the allele frequency trajectory is estimated. Cropland use per capita in North America data from (1), rescaled by use in 1600, to reflect intensity of agricultural practices. **D)** The trajectory of alleles at known herbicide resistance loci through time, fit by logistic regression for each of the biallelic resistance alleles present in our contemporary data (excluding EPSPSamp with its complex allelic structure). Dots represent genotypes for each historical and contemporary sample at each herbicide resistance locus. 95% credible interval of the maximum likelihood estimate of selection between 1960-2018 provided in the legend for each resistance allele.

# ***Concurrent temporal shifts in ancestry underlie agricultural adaptation***

Finally, we explored whether historical demographic change over the last two centuries has played a role in agricultural adaptation. Early taxonomy described two different *A. tuberculatus* varieties as separate species, with few distinguishing characteristics (seed dehiscence and tepal length (15)). Sauer's 1955 revision of the genus, which used herbarium specimens to gauge the distribution and migration of congeners over the last two centuries (44), led him to describe an expansion of the southwestern var. *rudis* type (at the time, *A. tamariscinus* (Sauer)) northeastward into the territory of var. *tuberculatus* (*A. tuberculatus* (Sauer)), sometime between 1856-1905 and 1906-1955. Our sequencing of over 100 herbarium samples dating back to 1828, combined with 349 contemporary sequences (24, 45), allowed us to directly observe the change in the distribution of these two ancestral types, adding further temporal resolution to Sauer's morphological observations of the species' range shifts, and to assess the role of agriculturally-adaptive standing genetic variation across varieties.

Range-wide, we see clear shifts in the distribution of var. *rudis* ancestry based on fastSTRUCTURE (46) inference at K=2 (**Fig S9**) across three-time spans, 1830-1920, 1920-1980, and 1980-2018 (timespan:  $F = 5.47$ ,  $p = 0.0045$ ), and particularly so in the East (timespan x longitude:  $F = 5.49$ ,  $p = 0.0045$ ), consistent with a recent expansion of var. *rudis* ancestry (**Fig 4A**). Furthermore, we see strong state and province-specific shifts in ancestry through time in our historical sequences (time span by state interaction:  $F = 4.22$ ,  $p = 7 \times 10^{-5}$ ), highlighting not only the shift of var. *rudis* eastwards (with increases through time in Ontario, Ohio, Illinois, and Missouri) but also the very recent introduction of var. *tuberculatus* ancestry into the most western part of the range in Kansas (**Fig 4B**). *A. tuberculatus* demography thus appears to have been drastically influenced by human-mediated landscape change over the last two centuries, consistent with the massive recent expansion of effective population size we have previously inferred from contemporary samples over this same timeframe (43). That this shift has been most notable over the last 40 years is further consistent with the timescale of agricultural intensification, shifts towards conservation tillage, and rampant herbicide resistance evolution within the species (18, 43, 47, 48), suggesting selection on resistance may facilitate the colonization of var. *rudis* ancestry outside its historical range. Along these lines, we find this contemporary expansion has facilitated the sorting of var. *rudis* ancestry across environments (a longitude by time span by environment interaction:  $F = 5.13$ ,  $p = 4 \times 10^{-5}$ ; **Fig 4C**), with increasing overrepresentation of var. *rudis* ancestry in agricultural and disturbed environments in the eastern portion of the range through time, as previously suggested (24).

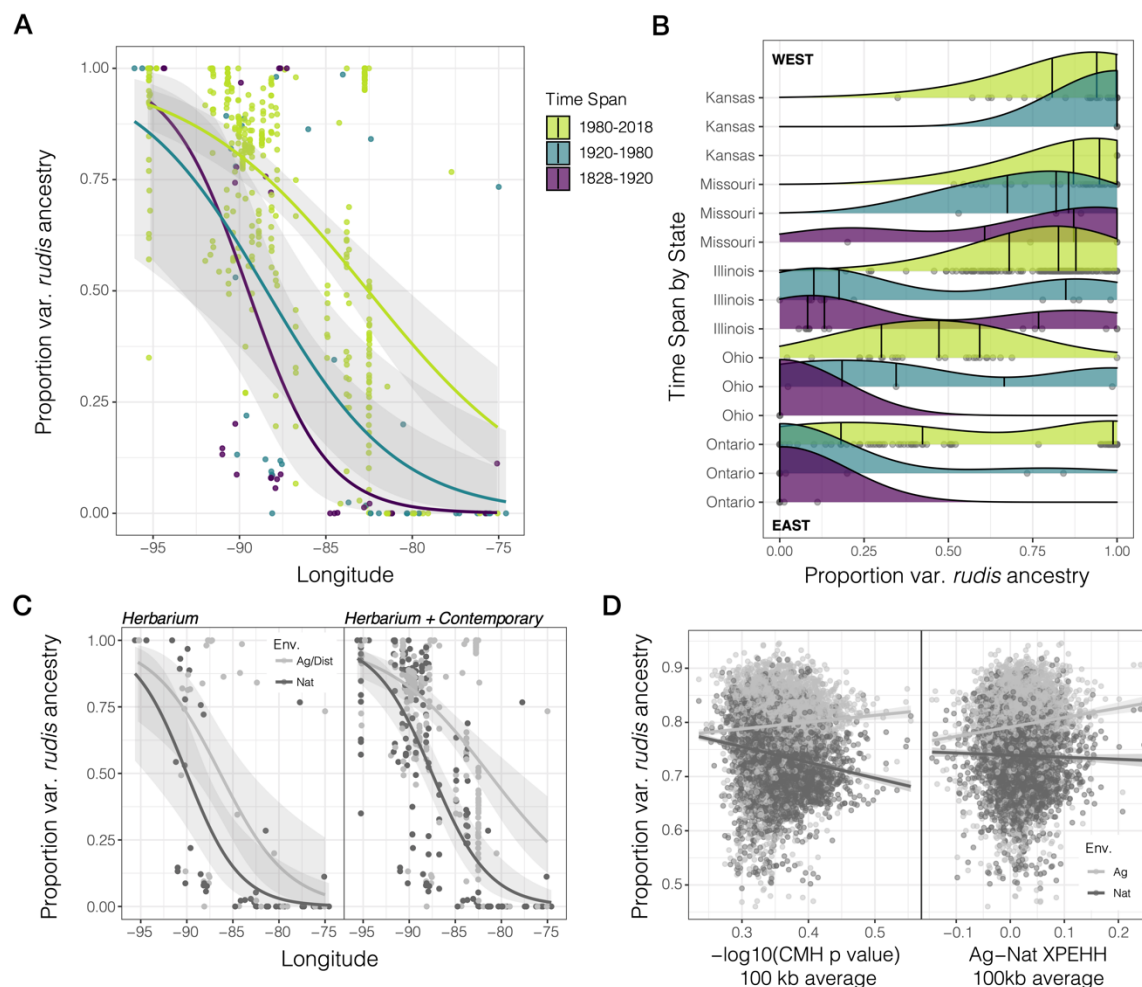

**Fig 4. Temporal shifts in the distribution of var. *rudis* ancestry have facilitated polygenic agricultural adaptation.** **A)** Longitudinal clines in individual-level var. *rudis* ancestry over three timespans, illustrating the expansion of var. *rudis* ancestry eastwards over the last two centuries. **B)** The distribution of individual-level var. *rudis* ancestry by state and through time, illustrating state-specific changes in ancestry. Vertical lines represent first, second, and third quantiles of ancestry within each timespan and state. Timespans indicated in (A). No individuals were collected from Kansas between 1828-1920. **C)** Increasing sorting of individual-level var. *rudis* ancestry into agricultural environments on contemporary timescales. **D)** Environment-specific metrics of selection (CMH p-value and cross-population extended haplotype homozygosity (XPEHH)) across the genome in 100 kb windows positively correlate with var. *rudis* ancestry in agricultural, but not natural habitats (XPEHH by Environment:  $F=9.34$ ,  $p=0.002$ ; CMH by Environment:  $F=99.70$ ,  $p < 10^{-16}$ ).

To investigate whether agricultural adaptation has drawn disproportionately from var. *rudis* ancestry, we reconstructed fine-scale ancestry across the genome. Based on analyses in 100 kb windows, we find a least-squares mean of 5.5% (95% CI = [5.0, 5.9%]) more var. *rudis* ancestry genome-wide in agricultural environments compared to the adjacent natural habitat (**Fig S10**). The environment-specific proportion of var. *rudis*

ancestry is not only positively correlated with recombination rate ( $F = 16.67$ ,  $p = 4.5 \times 10^{-5}$ ,  $r = 0.056$ ) and gene density ( $F = 5.85$ ,  $p = 0.016$ ,  $r = 0.499$ ) but also with SNP and haplotype-based evidence of environment-specific selection. Agricultural, but not natural populations, have an excess of cross-population haplotype homozygosity (agricultural vs. natural XPEHH) and within-pair environmental differentiation (CMH p-value) in genomic regions of high var. *rudis* ancestry (XPEHH by Environment:  $F=9.34$ ,  $p=0.002$ ; CMH by Environment:  $F=99.70$ ,  $p < 10^{-16}$ ; **Fig 4D**), implying that ancestry composition genome-wide in large part determines the extent of polygenic agricultural adaptation. These findings suggest that the expansion of var. *rudis* ancestry across the range, particularly in the last 40 years, has facilitated waterhemp's success in agricultural habitats through providing access to preadapted, standing genetic variation.

## Discussion

Agricultural adaptation in *A. tuberculatus*, a native plant in North America, has occurred over extremely rapid timescales, facilitated by range shifts in response to the agriculturalization of its native habitat. The human-mediated expansion of the southwestern lineage of the species northeastwards since the latter half of the 20th century has introduced new genetic variation across the range and across the genome, on which selection in agricultural settings could act. Negligible genetic differentiation across habitats in this species refutes the idea of agriculture existing as separate to natural ecosystems (49). Despite substantial gene flow and concurrent with the intensification of agriculture, the prevalence of agricultural alleles has increased rapidly over just the last 60 years, in agricultural environments by nearly 6% per year, and even in natural sites by more than 2% per year. The empirical estimates of selection coefficients for herbicide resistance provided here—20% per year range-wide over a 60-year period—emphasizes the rapid and lasting impact of agricultural herbicides across heterogeneous environments. While modern, industrial agriculture imposes strengths of selection rarely observed in the wild, this species has in turn escalated the weed management-evolution arms race through a multitude of interdependent mechanisms: range expansion, polygenic adaptation from standing genetic variation, and large effect herbicide resistance mutations.

Together, these results highlight that anthropogenic change not only leads to the formation of new habitats but also provides an opportunity for range expansion that may facilitate and feedback with local adaptation, reshaping genetic variation for fitness within native and potentially weedy species.

# References and Notes

1. K. Klein Goldewijk, A. Beusen, J. Doelman, E. Stehfest, Anthropogenic land use estimates for the Holocene – HYDE 3.2. *Earth Syst. Sci. Data*. **9**, 927–953 (2017).
2. T. G. Benton, J. A. Vickery, J. D. Wilson, Farmland biodiversity: is habitat heterogeneity the key? *Trends in Ecology & Evolution*. **18** (2003), pp. 182–188.
3. E. Malaj, L. Freistadt, C. A. Morrissey, Spatio-temporal patterns of crops and agrochemicals in Canada over 35 years. *Front. Environ. Sci.* **8** (2020), doi:10.3389/fenvs.2020.556452.
4. J. Fernandez-Cornejo, R. F. Nehring, C. Osteen, S. Wechsler, A. Martin, A. Vialou, Pesticide use in U.s. agriculture: 21 selected crops, 1960-2008. *SSRN Electron. J.* (2014), doi:10.2139/ssrn.2502986.
5. N. E. Borlaug, Contributions of conventional plant breeding to food production. *Science*. **219**, 689–693 (1983).
6. H. J. Beckie, K. N. Harker, L. M. Hall, S. I. Warwick, A. Légère, P. H. Sikkema, G. W. Clayton, A. G. Thomas, J. Y. Leeson, G. Séguin-Swartz, M.-J. Simard, A decade of herbicide-resistant crops in Canada. *Can. J. Plant Sci.* **86**, 1243–1264 (2006).
7. C. Mann, Reseeding the Green Revolution. *Science* (1997), doi:10.1126/science.277.5329.1038.
8. P. L. Pingali, Green revolution: impacts, limits, and the path ahead. *Proc. Natl. Acad. Sci. U. S. A.* **109**, 12302–12308 (2012).
9. P. Pellegrini, R. J. Fernández, Crop intensification, land use, and on-farm energy-use efficiency during the worldwide spread of the green revolution. *Proc. Natl. Acad. Sci. U. S. A.* **115**, 2335–2340 (2018).
10. J. Mallet, The evolution of insecticide resistance: Have the insects won? *Trends Ecol. Evol.* **4**, 336–340 (1989).
11. C. Délye, M. Jasieniuk, V. Le Corre, Deciphering the evolution of herbicide resistance in weeds. *Trends Genet.* **29**, 649–658 (2013).
12. N. J. Hawkins, C. Bass, A. Dixon, P. Neve, The evolutionary origins of pesticide resistance. *Biol. Rev. Camb. Philos. Soc.* (2018), doi:10.1111/brv.12440.
13. F. Gould, Z. S. Brown, J. Kuzma, Wicked evolution: Can we address the sociobiological dilemma of pesticide resistance? *Science*. **360**, 728–732 (2018).
14. F. Zabel, R. Delzeit, J. M. Schneider, R. Seppelt, W. Mauser, T. Václavík, Global impacts of future cropland expansion and intensification on agricultural markets and biodiversity. *Nat. Commun.* **10**, 2844 (2019).



- 476 15. J. Sauer, REVISION OF THE DIOECIOUS AMARANTHS. *Madroño*. **13**, 5–46 (1955).
- 477 16. K. E. Waselkov, K. M. Olsen, Population genetics and origin of the native North American  
478 agricultural weed waterhemp (*Amaranthus tuberculatus*; *Amaranthaceae*). *Am. J. Bot.* **101**,  
479 1726–1736 (2014).
- 480 17. M. Costea, S. E. Weaver, F. J. Tardif, The Biology of Invasive Alien Plants in Canada. 3.  
481 *Amaranthus tuberculatus* (Moq.) Sauer var. *rudis* (Sauer) Costea & Tardif. *Can. J. Plant*  
482 *Sci.* **85**, 507–522 (2005).
- 483 18. P. J. Tranel, Herbicide resistance in *Amaranthus tuberculatus*†. *Pest Manag. Sci.* **77**, 43–54  
484 (2021).
- 485 19. J. Hermisson, P. S. Pennings, Soft sweeps: molecular population genetics of adaptation  
486 from standing genetic variation. *Genetics*. **169**, 2335–2352 (2005).
- 487 20. R. D. H. Barrett, D. Schluter, Adaptation from standing genetic variation. *Trends Ecol.*  
488 *Evol.* **23**, 38–44 (2008/1).
- 489 21. M. Alleaume-Benharira, I. R. Pen, O. Ronce, Geographical patterns of adaptation within a  
490 species’ range: interactions between drift and gene flow. *J. Evol. Biol.* **19**, 203–215 (2006).
- 491 22. R. I. Colautti, S. C. H. Barrett, Rapid adaptation to climate facilitates range expansion of an  
492 invasive plant. *Science*. **342**, 364–366 (2013).
- 493 23. M. Szűcs, M. L. Vahsen, B. A. Melbourne, C. Hoover, C. Weiss-Lehman, R. A. Hufbauer,  
494 Rapid adaptive evolution in novel environments acts as an architect of population range  
495 expansion. *Proc. Natl. Acad. Sci. U. S. A.* **114**, 13501–13506 (2017).
- 496 24. J. M. Kreiner, A. Caballero, S. I. Wright, J. R. Stinchcombe, Selective ancestral sorting and  
497 de novo evolution in the agricultural invasion of *Amaranthus tuberculatus*. *Evolution*  
498 (2021), doi:10.1111/evo.14404.
- 499 25. F. E. Dayan, S. O. Duke, in *Hayes’ Handbook of Pesticide Toxicology*, R. Krieger, Ed.  
500 (Academic Press, New York, 2010), pp. 1733–1751.
- 501 26. J. G. Moraes, T. R. Butts, V. M. Anunciato, J. D. Luck, W. C. Hoffmann, U. R. Antuniassi,  
502 G. R. Kruger, Nozzle selection and adjuvant impact on the efficacy of glyphosate and PPO-  
503 inhibiting herbicide tank-mixtures. *Agronomy (Basel)*. **11**, 754 (2021).
- 504 27. W. Moeder, O. Del Pozo, D. A. Navarre, G. B. Martin, D. F. Klessig, Aconitase plays a role  
505 in regulating resistance to oxidative stress and cell death in *Arabidopsis* and *Nicotiana*  
506 *benthamiana*. *Plant Mol. Biol.* **63**, 273–287 (2007).
- 507 28. P. A. Ribone, M. Capella, R. L. Chan, Functional characterization of the homeodomain  
508 leucine zipper I transcription factor AtHB13 reveals a crucial role in *Arabidopsis*  
509 development. *J. Exp. Bot.* **66**, 5929–5943 (2015).

29. J. V. Cabello, R. L. Chan, The homologous homeodomain-leucine zipper transcription factors HaHB1 and AtHB13 confer tolerance to drought and salinity stresses via the induction of proteins that stabilize membranes. *Plant Biotechnol. J.* **10**, 815–825 (2012).
30. S. Guénin, J. Hardouin, F. Paynel, K. Müller, G. Mongelard, A. Driouich, P. Lerouge, A. R. Kermode, A. Lehner, J.-C. Mollet, J. Pelloux, L. Gutierrez, A. Mareck, AtPME3, a ubiquitous cell wall pectin methylesterase of *Arabidopsis thaliana*, alters the metabolism of cruciferin seed storage proteins during post-germinative growth of seedlings. *J. Exp. Bot.* **68**, 1083–1095 (2017).
31. S. Zhou, L. Jia, H. Chu, D. Wu, X. Peng, X. Liu, J. Zhang, J. Zhao, K. Chen, L. Zhao, *Arabidopsis* CaM1 and CaM4 Promote Nitric Oxide Production and Salt Resistance by Inhibiting S-Nitrosogluthathione Reductase via Direct Binding. *PLoS Genet.* **12**, e1006255 (2016).
32. C. Dai, Y. Lee, I. C. Lee, H. G. Nam, J. M. Kwak, Calmodulin 1 Regulates Senescence and ABA Response in *Arabidopsis*. *Front. Plant Sci.* **9**, 803 (2018).
33. H. Guo, H. Yang, T. C. Mockler, C. Lin, Regulation of flowering time by *Arabidopsis* photoreceptors. *Science*. **279**, 1360–1363 (1998).
34. T. Mockler, H. Yang, X. Yu, D. Parikh, Y.-C. Cheng, S. Dolan, C. Lin, Regulation of photoperiodic flowering by *Arabidopsis* photoreceptors. *Proc. Natl. Acad. Sci. U. S. A.* **100**, 2140–2145 (2003).
35. W. Wang, X. Lu, L. Li, H. Lian, Z. Mao, P. Xu, T. Guo, F. Xu, S. Du, X. Cao, S. Wang, H. Shen, H.-Q. Yang, Photoexcited CRYPTOCHROME1 Interacts with Dephosphorylated BES1 to Regulate Brassinosteroid Signaling and Photomorphogenesis in *Arabidopsis*. *Plant Cell*. **30**, 1989–2005 (2018).
36. J. Li, Y. Li, S. Chen, L. An, Involvement of brassinosteroid signals in the floral-induction network of *Arabidopsis*. *J. Exp. Bot.* **61**, 4221–4230 (2010).
37. F. E. Dayan, P. R. Daga, S. O. Duke, R. M. Lee, P. J. Tranel, R. J. Doerksen, Biochemical and structural consequences of a glycine deletion in the  $\alpha$ -8 helix of protoporphyrinogen oxidase. *Biochimica et Biophysica Acta (BBA) - Proteins and Proteomics*. **1804**, 1548–1556 (2010).
38. H. M. Cockerton, S. S. Kaundun, L. Nguyen, S. J. Hutchings, R. P. Dale, A. Howell, P. Neve, Fitness cost associated with enhanced EPSPS gene copy number and glyphosate resistance in an *Amaranthus tuberculatus* population. *Cold Spring Harbor Laboratory* (2021), p. 2021.01.09.426028, , doi:10.1101/2021.01.09.426028.
39. Kreiner, J.M. Latorre, S.M., Burbano, H.A., Stinchcombe, J.R., Otto, S.P., Weigel, D., Wright, S., Materials and Methods for “200 years of agricultural adaptation and range expansion in a native weed.” *Science*.
40. N. H. Barton, The “New Synthesis.” *Proceedings of the National Academy of Sciences*. **119**,

547 e2122147119 (2022).

548 41. M. Przeworski, The signature of positive selection at randomly chosen loci. *Genetics*. **160**,  
549 1179–1189 (2002).

550 42. Y. Kim, R. Nielsen, Linkage disequilibrium as a signature of selective sweeps. *Genetics*.  
551 **167**, 1513–1524 (2004).

552 43. J. M. Kreiner, G. Sandler, A. J. Stern, P. J. Tranel, D. Weigel, J. Stinchcombe, S. I. Wright,  
553 Repeated origins, widespread gene flow, and allelic interactions of target-site herbicide  
554 resistance mutations. *Elife*. **11**, e70242 (2022).

555 44. J. Sauer, Recent Migration and Evolution of the Dioecious Amaranths. *Evolution*. **11**, 11–31  
556 (1957).

557 45. J. M. Kreiner, D. A. Giacomini, F. Bemm, B. Waithaka, J. Regalado, C. Lanz, J.  
558 Hildebrandt, P. H. Sikkema, P. J. Tranel, D. Weigel, J. R. Stinchcombe, S. I. Wright,  
559 Multiple modes of convergent adaptation in the spread of glyphosate-resistant *Amaranthus*  
560 *tuberculatus*. *Proc. Natl. Acad. Sci. U. S. A.* **116**, 21076–21084 (2019).

561 46. A. Raj, M. Stephens, J. K. Pritchard, fastSTRUCTURE: variational inference of population  
562 structure in large SNP data sets. *Genetics*. **197**, 573–589 (2014).

563 47. M. J. Foes, L. Liu, P. J. Tranel, L. M. Wax, E. W. Stoller, A biotype of common waterhemp  
564 (*Amaranthus rudis*) resistant to triazine and ALS herbicides. *Weed Sci.* **46**, 514–520 (1998).

565 48. P. J. Tranel, C. W. Riggins, M. S. Bell, A. G. Hager, Herbicide resistances in *Amaranthus*  
566 *tuberculatus*: a call for new options. *J. Agric. Food Chem.* **59**, 5808–5812 (2011).

567 49. Q. C. B. Cronk, J. L. Fuller, *Plant invaders: The threat to natural ecosystems* (Routledge,  
568 2014).

569 50. S. M. Latorre, P. L. M. Lang, H. A. Burbano, R. M. Gutaker, Isolation, Library Preparation,  
570 and Bioinformatic Analysis of Historical and Ancient Plant DNA. *Curr Protoc Plant Biol.*  
571 **5**, e20121 (2020).

572 51. S. Chen, Y. Zhou, Y. Chen, J. Gu, fastp: an ultra-fast all-in-one FASTQ preprocessor.  
573 *Bioinformatics*. **34** (2018), pp. i884–i890.

574 52. H. Li, R. Durbin, Fast and accurate short read alignment with Burrows-Wheeler transform.  
575 *Bioinformatics*. **25**, 1754–1760 (2009).

576 53. A. Peltzer, G. Jäger, A. Herbig, A. Seitz, C. Knip, J. Krause, K. Nieselt, EAGER: efficient  
577 ancient genome reconstruction. *Genome Biol.* **17**, 60 (2016).

578 54. H. Jónsson, A. Ginolhac, M. Schubert, P. L. F. Johnson, L. Orlando, mapDamage2.0: fast  
579 approximate Bayesian estimates of ancient DNA damage parameters. *Bioinformatics*. **29**,  
580 1682–1684 (2013).

55. S. Purcell, B. Neale, K. Todd-Brown, L. Thomas, M. A. R. Ferreira, D. Bender, J. Maller, P. Sklar, P. I. W. de Bakker, M. J. Daly, P. C. Sham, PLINK: a tool set for whole-genome association and population-based linkage analyses. *Am. J. Hum. Genet.* **81**, 559–575 (2007).
56. D. M. Emms, S. Kelly, OrthoFinder: solving fundamental biases in whole genome comparisons dramatically improves orthogroup inference accuracy. *Genome Biol.* **16**, 157 (2015).
57. S. F. Altschul, W. Gish, W. Miller, E. W. Myers, D. J. Lipman, Basic local alignment search tool. *J. Mol. Biol.* **215**, 403–410 (1990).
58. Z. A. Szpiech, R. D. Hernandez, selscan: an efficient multithreaded program to perform EHH-based scans for positive selection. *Mol. Biol. Evol.* **31**, 2824–2827 (2014).
59. O. Delaneau, J.-F. Zagury, J. Marchini, Improved whole-chromosome phasing for disease and population genetic studies. *Nat. Methods.* **10**, 5–6 (2013).
60. F. J. Tardif, I. Rajcan, M. Costea, A mutation in the herbicide target site acetohydroxyacid synthase produces morphological and structural alterations and reduces fitness in *Amaranthus powellii*. *New Phytol.* **169**, 251–264 (2006).
61. M. M. Vila-Aiub, S. S. Goh, T. A. Gaines, H. Han, R. Busi, Q. Yu, S. B. Powles, No fitness cost of glyphosate resistance endowed by massive EPSPS gene amplification in *Amaranthus palmeri*. *Planta.* **239**, 793–801 (2014).
62. C. Wu, A. S. Davis, P. J. Tranel, Limited fitness costs of herbicide-resistance traits in *Amaranthus tuberculatus* facilitate resistance evolution. *Pest Manag. Sci.* **74**, 293–301 (2018).
63. M. M. Vila-Aiub, Fitness of Herbicide-Resistant Weeds: Current Knowledge and Implications for Management. *Plants.* **8** (2019), doi:10.3390/plants8110469.
64. S. Gupta, A. Harkess, A. Soble, M. Van Etten, J. Leebens-Mack, R. S. Baucom, Inter-chromosomal linkage disequilibrium and linked fitness cost loci influence the evolution of nontarget site herbicide resistance in an agricultural weed. *bioRxiv* (2021), p. 2021.04.04.438381, , doi:10.1101/2021.04.04.438381.
65. B. Pasaniuc, S. Sankararaman, G. Kimmel, E. Halperin, Inference of locus-specific ancestry in closely related populations. *Bioinformatics.* **25**, i213–21 (2009).

**Acknowledgements:** We appreciate the pivotal contribution of numerous herbaria towards this research, especially the help of Eric Knox at the Indiana University Herbarium, Jamie Lynn Minnaert-Grote at the University of Illinois INHS Herbarium; Tedesse Mesfin at the University of Ohio Herbarium, Anton Reznicek at the University of Michigan Herbarium, Jim Solomon at the Missouri Botanical Gardens, Caleb Morse at the McGregor Herbarium at the University of Kansas, Tyler Smith and Song Wang at Agricultural and Agrifood Canada, and Deb Metsger and Tim Dickinson at the Royal Ontario Museum. We thank Mike Whitlock and Tom Booker (University of British Columbia), as well as Aneil Agrawal and Tyler Kent (University of Toronto), and Ailene Macpherson (Simon Fraser University) for input on the work; Christa Lanz and Rebecca Schwab (Max Planck Institute) for coordinating sequencing of herbarium samples; Ella Reiter (University of Leipzig) for scheduling and coordinating logistics for clean room facility work; and Patricia Lang, Sonja Kersten and Heike Budde (Max Planck Institute) for advice on molecular protocols troubleshooting.

**Funding:** JMK was supported by the Biodiversity Research Institute at the University of British Columbia and a Killam Fellowship. SIW was supported by a NSERC discovery grant and a Canada research chair. JRS was supported by a NSERC discovery grant. SPO was supported by NSERC RGPIN-2022-03726. SML, HAB and DW were supported by the Max Planck Society.

**Author Contributions:** JMK, JRS, and SIW conceptualized the paired sampling design, JMK, HAB, DW, JRS, and SIW conceptualized the use of herbarium data, JMK performed contemporary collections and curated the herbarium samples, SML and HAB conceptualized and designed the molecular work with herbarium specimens, SML coordinated the clean room facility work, JMK and SML performed DNA extraction and library preparations of herbarium tissue, SML oversaw the sequencing of herbarium specimens. JMK performed analyses with input from SPO, SIW, and JRS. SPO wrote the migration-selection balance and maximum likelihood models. JMK wrote and revised the paper with inputs from all authors.

**Competing interests:** The authors declare that they have no competing interests.

**Data and materials availability:** All new sequence has been archived at the SRA (BioProject ID PRJNA878842), while scripts and accompanying metadata have been archived on Github at [www.github.com/jkreinz/TemporalAdaptation](https://www.github.com/jkreinz/TemporalAdaptation).

## Supplementary Materials

This PDF file includes:

Materials & Methods

Figs. S1 to S13



659 Tables S1 to S5  
660 References 55-65  
661

# Supplementary Materials

## Materials & Methods

### *Herbarium collections*

In 2019, we obtained 10 mg tissue collections of herbarium specimens from 7 herbaria across Canada and the United States and one governmental organization: the Royal Ontario Museum Herbarium, the Museum of Biological Diversity at Ohio State University Herbarium, the Indiana University Herbarium, the Michigan State University Herbarium, the Illinois Natural History Survey Herbarium, Missouri Botanical Gardens, The McGregor Herbarium at the University of Kansas, and Agriculture and Agrifood Canada. We selected samples to have an even representation of habitats through time. Samples were classified as natural (n=54), agricultural (n=28), or disturbed (n=20) based on collectors' annotations on each plate: any reference to a cultivated field was treated as an 'agricultural' collection; general environmental descriptions such as dry grassland or riverbank was treated as a 'natural' collection; and reference to disturbed soil, railroad tracks, or manicured or managed land was treated as a 'disturbed' collection. For inference of contemporary allele frequency and ancestry change through time, samples collected from disturbed habitats were grouped together with the agricultural category—in both of which waterhemp exists as a weed (**Table S5**). When geographic coordinates were not provided, we referred to the state, county, section, intersection, and landmark descriptions to infer the geographic coordinate of a given sample. In total, we collected samples from 172 specimens, 108 of which were selected for whole-genome sequencing.

### *Herbarium DNA extractions & library preparations*

The work was performed in the ancient DNA lab at the University of Tübingen. For DNA extraction of the herbarium samples, we followed basic protocol 1 outlined in (50). Briefly, under sterile conditions, ~10 mg of each sample was ground and incubated with N-phenacylthiazolium bromide (PTB)-based mix overnight to lyse DNA. After a shredding step with QIAshredder spin columns, DNA was purified and eluted with DNAeasy Mini spin columns. Sequencing libraries were prepared using the basic protocol 2 outlined in (50), performing blunt-end repair, adapter ligation, a fill-in reaction, indexing, and finally PCR amplification (10 cycles) and a cleaning step. The libraries were sequenced on an Illumina NovaSeq instrument on a single flow cell. The sequencing run produced ~3,442 Gb data, an average of 32 Gb per sample.

### *Mapping, damage correction, SNP calling and filtering*

We removed adapters, polyQ tails, and merged reads from herbarium sequencing reads

using fastp (51). Because of the small fragment size of historical DNA, this resulted in a sizable loss of sequence coverage, from 46X coverage to a mean of 11X coverage. Mapping with bwa mem (52), we found on average, 89% of merged reads mapped to the female, US Midwestern, reference genome from (45), suggesting low rates of contamination by exogenous DNA. Finally, we performed de-duplication of merged reads with DeDup (53), which is optimized for merged paired-end sequencing data. This resulted in a final mean per-sample coverage of 9.7X.

We used the program MapDamage2.0 (54) to quantify damage patterns in the historical DNA. The fraction of C deamination, which leads to C-to-T substitutions, was low, at the first base ~2% on average across samples, barely inflated above the C-to-T substitution rate across the rest of the reads (Fig S3). Nonetheless, the fraction of C-to-T substitutions at the first base was positively correlated with the age of the samples ( $r = 0.46$ ,  $t = -5.31$ ,  $p = 5.94\text{e-}07$ ; Fig S3). We thus used MapDamage2.0 to rescale base-quality scores to take into account the patterns of DNA damage. We called SNPs with freebayes (v1.3.2; with the arguments --use-best-n-alleles 4, --report-monomorphic) in 100 kb regions in parallel across the genome, merged, and then filtered SNPs based on the relationship between QUAL and DP ( $\text{QUAL/DP} > 30$ ). In total, this resulted in 14,139,333 SNPs before merging with our contemporary data and filtering on missing data.

Herbicide resistance alleles in herbarium samples were identified based on known locations of non-synonymous substitutions within ALS and EPSPS. Initially, two genotype calls from herbarium samples that predated the onset of ALS herbicide use in the 1950s, showed standing variation for resistance at ALS574 and ALS122: one individual heterozygous for Trp-574-Leu collected in 1930 from a sandy agricultural field in St. Louis, Missouri, USA (HB0973); and another individual heterozygous for Ala-122-Ser collected in 1895 from a corn field in Fayette, Ohio, USA (HB0914). Upon further inspection, read-level support for resistance alleles was low with the allelic-bias at these genotype calls being highly skewed (reference to alternate ratio = 1:9 and 2:18, respectively). Similarly, one individual collected in 1967 from the Bottom of Maumee River, Ohio (HB0977) was heterozygous for ALS122, but the alternate resistance allele had support at only one read (reference to alternate ratio = 1:7). We subsequently dropped these genotype calls from analyses of selection on herbicide resistance alleles through time. Relatedly, for both the set of 154 focal agricultural-alleles and ancestry informative SNPs used to call fine-scale ancestry across the genome, we investigated the potential for reference bias influencing our estimates of change through time. We calculated mean allelic bias (AB) for each set of alleles individually for each sample, and asked the extent to which it correlated with collection year (Figure S3). AB for either set of alleles was not significantly correlated with collection year (AB for agricultural alleles:  $\beta = 3.987 \times 10^{-5}$ ,  $p = 0.316$ ,  $t = 0.7527$ ; AB for ancestry informative alleles:  $\beta = -3.877 \times 10^{-5}$ ,  $p = -1.882$ ,  $t = 0.0626$ ).

*Metrics of differentiation across Environments: CMH,  $F_{ST}$ , & XPEHH*

We used the 7,262,599 genome-wide high-quality SNPs called from contemporary agricultural-natural paired populations (n=187 individuals total from 17 pairs of populations, 34 populations in total) from (24) (Fig 1). Previously, these data had been only used for genome-wide PCA and faststructure based individual-level ancestry estimates. To make use of our paired sampling design, we used plink (55) to perform a Cochran–Mantel–Haenszel test, testing an (environment x SNP | pair) effect after applying a minor allele frequency cutoff of 0.01. We identified candidate agriculturally-adaptive genes based on the nearest gene (bedtools closest) to each LD-clumped, [FDR-corrected] q-value < 0.1 SNP. We found the *Arabidopsis thaliana* orthologues of our *A. tuberculatus* genes with orthofinder (56). For genes where orthofinder found no *A. tuberculatus* orthologue and in which our annotation identified no orthologue in closely related species based on gene expression data, we used blastn (57) to perform a conclusive search for similar genes across species.

Additionally, we used plink to calculate Weir and Cockerham's  $F_{ST}$ , both between all natural and agricultural samples, and between environments within each population pair, which we later averaged to obtain the mean pairwise  $F_{ST}$ . For calculation of  $F_{ST}$  at the EPSPS amplification, we recoded individuals as 0, 1, 2 based on copy number amplitude (<1.5, 1.5 < copies < 2.5, and >2.5, respectively). Briefly, EPSPS copy number was estimated in Kreiner (2019), through scaling coverage within the EPSPS gene by the genome-wide average. We used selscan (58) to calculate the cross-population extended haplotype homozygosity, after read-back and population-level phasing with Shapeit2 (59), both of which required knowledge of recombination rates, which we supplied in the format of our imputed LD-based map from (45).

### *Models of Migration-Selection Balance*

Three resistance alleles showed significant differences in allele frequency across natural and agricultural environments (ALS574, EPSPSamp, and PPO210) based on a multiple regression approach (lm: genotype ~ pair + environment), reflecting differential selection pressures in the face of otherwise high rates of migration (as evidenced by the low genome-wide  $F_{ST}$ ). Indeed, previous experimental work on costs on resistance has shown several of these herbicide resistance mutations to be associated with substantial costs: the ALS574 mutation has been associated with a 67% reduction in above ground biomass in *A. palmeri* (60) whereas the EPSPS amplification has been associated with a 25% reduction in dry biomass in *A. tuberculatus* (38) but is associated with no observed cost in *A. palmeri* (61). In the context of the experimental conditions and genotypes used in Wu et al., 2019 (62), no costs of the PPO210 deletion were found. However, genotypic and environmental heterogeneity is a major limitation of experimental approaches to assaying costs (63).

We take a model fitting approach that implicitly takes into account such heterogeneity by looking over a diverse set of genotypes, environments, and selective regimes. Specifically, we fit a two-patch, two allele model of migration-selection balance to estimate the relative magnitude of migration and selection across environment types. In each patch, we first assume that the life cycle starts at the adult stage, followed by migration and then selection among the juveniles to the next census among adults:

$$\begin{aligned}x_S^* &= (1 - m_A)x_S + m_A y_S, x_R^* = (1 - m_A)x_R + m_A y_R \\y_S^* &= (1 - m_N)y_S + m_N x_S, y_R^* = (1 - m_N)y_R + m_N x_R\end{aligned}$$

where  $m_N$  and  $m_A$  represent immigration rates into natural and agricultural sites, respectively;  $x_S^*$  and  $x_R^*$  represent the frequency of the susceptible and resistant allele in agricultural environments after migration; and  $y_S^*$  and  $y_R^*$  represent the frequency of the susceptible and resistant allele in natural environments after migration. Assuming random mating, the frequencies of resistant (in agricultural,  $x_R'$ ; in natural,  $y_R'$ ) and susceptible alleles (in agricultural,  $x_S'$ ; in natural,  $y_S'$ ) after selection are proportional to:

$$\begin{aligned}x_S' &= \frac{x_S^* (x_S^* W_{SS} + x_R^* W_{SR})}{x_S^* (x_S^* W_{SS} + x_R^* W_{SR}) + x_R^* (x_R^* W_{RR} + x_S^* W_{SR})}, \\x_R' &= \frac{x_R^* (x_R^* W_{RR} + x_S^* W_{SR})}{x_S^* (x_S^* W_{SS} + x_R^* W_{SR}) + x_R^* (x_R^* W_{RR} + x_S^* W_{SR})} \\y_S' &= \frac{y_S^* (y_S^* V_{SS} + y_R^* V_{SR})}{y_S^* (y_S^* V_{SS} + y_R^* V_{SR}) + y_R^* (y_R^* V_{RR} + y_S^* V_{SR})}, \\y_R' &= \frac{y_R^* (y_R^* V_{RR} + y_S^* V_{SR})}{y_S^* (y_S^* V_{SS} + y_R^* V_{SR}) + y_R^* (y_R^* V_{RR} + y_S^* V_{SR})}\end{aligned}$$

Where  $W$  and  $V$  reflect the average fitness of each genotype in agricultural and natural environments, respectively. Assuming additivity with  $s_N$  measuring the selective cost of the resistant allele in natural environments ( $V_{RR} = 1 - s_N, V_{RS} = 1 - s_N/2, V_{SS} = 1$ ) and  $s_A$  measuring the selective benefit of the resistant allele in agricultural environments ( $W_{RR} = 1 + s_A, W_{RS} = 1 + s_A/2, W_{SS} = 1$ ) and assuming that migration at the loci is much weaker than selection ( $m \ll s$ ), a given pair of populations is expected to approach a steady state, where:

$$\frac{s_A}{m_A} = \frac{2(y_R - x_R)}{y_S y_R} \text{ in agricultural patches and } \frac{s_N}{m_N} = \frac{2(x_S - y_S)}{x_S x_R} \text{ in natural patches}$$

While it is not possible to solve for selection directly in the absence of data on migration rates, these formulae allow us to estimate the strength of divergence by inferring the strength of selection relative to migration in natural ( $\frac{s_N}{m_N}$ ) and agricultural ( $\frac{s_A}{m_A}$ )



environments, as presented in **Table S3**. The ratio of these metrics gives the ratio of the cost faced per migrant that has arrived in natural environments versus the benefit per migrant that has arrived in agricultural environments, assuming that the pair of populations is near equilibrium. We note that the approach to migration-selection balance occurs exponentially at a rate proportional to the selection coefficient (when  $m \ll s \ll 1$ ) and so should occur rapidly at sites under strong selection (**Supplemental Index 1**).

### *Logistic models of temporal allele frequency change*

We used CMH outliers from the contemporary paired population scan to investigate patterns of agricultural-allele frequency change over the last two centuries. We were interested in tracking independent allele frequency trajectories, so from the 403 SNPs with CMH p-values that exceeded 10% FDR correction ( $p < 6 \times 10^{-6}$ ), we performed a subsequent clumping step, effectively retaining a set of largely unlinked SNPs (**Fig S11**) that represent the most significant SNP in a particular region. Average LD across SNPs was 0.043, with only four pairs of SNPs showing high pairwise LD ( $r^2 > 0.4$ ) with another SNP. All of these four SNP pairs are found on separate chromosomes from the SNP with which it has high LD, suggesting the correlation is not driven by linked selection (alternatively, genome-assembly or polygenic adaptation [such as in (43, 64)] may drive such a signal). Specifically, we used plink --clump, to find the most significant hit genome-wide, scan 1 Mb around it, and exclude any SNP from the resulting output that is in  $r^2 > 0.25$  with the focal SNP. This algorithm is repeated until all SNPs passing the genome-wide significance threshold have been clumped. This resulted in 251 loci that on average showed a 17.9% allele frequency difference between extant agricultural and natural environments. Because some of the alternate alleles across these loci were more frequent in natural environments, we redefined the alleles based on which one was more common in agricultural compared to natural sites.

We then found the intersection of these agriculture-associated alleles, identified in our contemporary paired collections, with the historical, filtered SNPs from the herbarium sequence data. 154 loci were present in the historical samples with the same reference/alternate allele combinations. Because the definition of agriculture-associated alleles depend on their relative frequency across environment types, such alleles represent both reference (91/154) and alternate (63/154) bases. We extracted a matrix of 0, 0.5, 1 values, representing the frequency of the agricultural allele for each locus within each individual, for samples from both our contemporary and historical collections. Combining these individual agricultural allele frequencies at each locus across historical and contemporary datasets, we then performed a logistic regression in R (glm function, family="binomial") of genotype on collection year, separately on samples from either natural or agricultural environments. From each logistic regression, we extracted the logit-transformed slope, p-value, and standard error, as well as the predicted value (allele frequency) at 1870 and 2018, representing the minimum sample year and maximum sample year. The slope gives an estimate of the selection coefficient,  $s$  (specifically, slope

=  $s/2$ ) where  $s$  is the difference in fitness between the two homozygotes and the division by two comes from using a diploid model. Specifically, with homozygote fitness of  $1+s$  and heterozygote fitness of  $\sqrt{1+s} \sim 1+s/2$ , measured relative to the wildtype homozygote, the allele frequency over time has a generalized logistic form:

$$p(t) = \frac{p_0 e^{st/2}}{1 - p_0 + p_0 e^{st/2}}$$

where  $p_0$  is the allele frequency at time ( $t$ ) 0. While we have samples dating back to 1828, we constrained this analysis to samples collected after 1870, as the density of samples before then is low ( $n=4$ ), with no representation of samples from agricultural environments.

The total allele frequency change at each locus was calculated by taking the difference between the predicted frequency of the allele in 2018 and 1870. We merged the output of these locus-specific logistic regressions in agricultural environments, with both SNP and haplotype-based statistics from these same individuals to identify contemporary correlates of the magnitude of allele frequency change and selection through time. Specifically, we examined how well contemporary recombination rate, XPEHH, CMH  $p$ -value, number of SNPs in linkage ( $r^2 > 0.25$ ) with the focal SNP ( $< 1\text{Mb}$ ; i.e., number of SNPs in a clump), and distance between linked SNPs, explained both the total allele frequency change and the estimated strength of selection (**Fig S6**).

We also performed a separate set of analyses, where a logistic regression was used to analyze the trajectory of all agricultural alleles or known herbicide resistance alleles at once, first across samples from natural environments and then for samples from agricultural and disturbed environments ('genotype ~ year + locus'; **Fig 3C, D**). We further partitioned samples in each environment to those that predate or are subsequent to the 1960s, to infer the importance of the intensification of agriculture and herbicides in shaping the strength of selection on contemporary agricultural loci. For each of the four logistic regressions ran on these partitioned sets of data, the slope of the year term represents a joint estimate of the strength of selection for agricultural alleles, between 1870-1960 or 1960-2018, in natural or agricultural environments. We refer to this joint estimate of selection at multiple loci as  $\tilde{s}$ .

To test whether a comparison of selection before and after the 1960's was statistically supported, we also compared our full model analyzing temporal signatures of allele frequency change between 1870-1960 to one that fits either two or three logistic regression lines between that time frame (i.e., a segmented logistic regression). A segmented logistic regression with two breakpoints provides the best fit to our data, compared to a model with either one or no breakpoints (two-break segmented AIC=54360.55, one-break segmented AIC =54437.66, non-segmented AIC=54444.67), and converges on 1913 and 1961 breakpoints, the later supporting a priori hypotheses and

our interest in interrogating signals before and after the start of the Green Revolution in 1960 (**Fig 3C**).

We designed a randomization test based on observed allele frequency changes across the genome to obtain an expected distribution under null processes (drift, migration, selection, and demographic change). In particular, we were interested in quantifying the potential bias in higher frequency agricultural alleles having the leeway to change more through time, as compared to a set of lower frequency alleles. We thus randomly sampled 154 loci from our contemporary collections (the same number as our observed clumped and historically matched set of agricultural alleles), 1000x across the genome, exactly matching the frequency distribution observed for extant agricultural alleles. This randomization was done independently in each environment, such that the alleles sampled to match the extant agricultural-allele frequency distribution in agricultural environments in one iteration were different from the alleles sampled to match the frequency distribution in natural environments (**Fig S4**). To account for the ascertainment bias in our set of putatively agriculturally adaptive alleles—alleles that show the greatest excess of allele frequency in agricultural compared to natural environments—we further constrained these randomizations to alleles across the genome which were at greater frequency in agricultural than in natural environments (which may reflect either the reference or alternate allele). In each of the 1000 randomizations within each environment, we then performed the same analyses as above: matching these alleles in our historical samples, producing a matrix of genotype data for both contemporary and historical sets, and performing a logistic regression for each locus, as well as logistic regression on all loci at once, for either samples from natural or agricultural environments, and for those that either preceded or were subsequent to 1960. For the 1000x randomizations within agricultural and natural environments, we then computed the 2.75 and 97.25% quantiles (“null 95% interquantile range”) of the statistics of interest (total allele frequency change and selection coefficients) to compare against our observed values. Note that these null expectations implicitly account for changing ancestry through time, as genome-wide genotypes from individuals spanning our temporal sampling produce the expectation of allele frequency change.

We performed forward-time simulations in SLIM (v3.7.1) to validate the robustness of our space-time herbarium sampling approach for inference of the strength of selection for a set of alleles. On a genomic background of length 100kb, with a recombination rate scaled to approximately that of *Arabidopsis thaliana* ( $4 \times 10^{-6}$ ), we started by evolving additive mutations (with a mutation rate of  $5 \times 10^{-6}$ ) neutrally for 2000 generations in 5000 individuals. After this time period, we imposed an environmental shift which results in those once neutral mutations become beneficial [with an exponential distribution of fitness effects centered on  $s=0.1$ ]. This represents selection on standing genetic variation, and potentially, any new mutations that arise after the onset of selection). After this environmental shift, we start our temporal sampling following the same temporal distribution and total sample size used in our manuscript (i.e  $t = 0, 5, 6, 7, 10, 10, 12$

... 141, representing years sampled after 1870,  $n = 104$  [removing four individuals from < 1870), with individuals randomly sampled across 2D space. From these simulations, we find our temporal and spatial historical sampling approach is able to provide an accurate estimate of  $s$  for a set of alleles. On average, the correlation coefficient between estimated  $s$  and true  $s$  using the method described above for 500 simulations was 0.61 (SE=0.067). The accuracy of this method will depend on the  $N$  (sequenced sample size),  $s$  (distribution of true selection coefficients) and  $N_e$  (species-wide) at hand.

### *Maximum likelihood estimate of selection*

For known biallelic herbicide resistance alleles (excluding only the complex EPSPS amplification), we were particularly interested in individual estimates of selection on each allele over time. We used a maximum likelihood approach to estimate the strength of selection for each resistance allele between 1960-2018, along with a 95% credibility interval using profile likelihood. Summing overall years ( $t$ ), the log-likelihood of observing the data is given by the binomial sampling formula describing the chance of observing the number of resistant ( $n_R$ ) and susceptible alleles ( $n_S$ ) in any given year:

$$\ln(L) = \sum_t (n_R \cdot \ln(\frac{p_0 e^{st/2}}{1 - p_0 + p_0 e^{st/2}}) + n_S \cdot \ln(\frac{1 - p_0}{1 - p_0 + p_0 e^{st/2}}))$$

where  $p_0$  represents the frequency of the allele when  $t = 0$  (defined as the present for ease of computation) and  $s$  represents the strength of selection (see logistic allele frequency trajectory equation above), both of which are unknown and estimated by maximizing the likelihood. Because many of the resistant alleles were only observed in contemporary samples, selection must be sufficiently strong on recent timescales to explain this rise, but the maximum strength of selection cannot be determined (the likelihood surface becomes flat). We thus only present the 95% confidence interval in the text (i.e., those values of  $s$  for which the  $\ln(L)$  falls within  $\chi^2_{[0.05]}/2$  of the maximum likelihood). We implemented this algorithm in R, using the mle2 function implemented within the bblme package in R.

### *Ancestry inference*

For genome-wide ancestry inference, we merged filtered SNPs from herbarium samples with high-quality SNP sets from (24) ( $n=187$ , collections from 2018) and (45) ( $n=162$ , collections from 2015), resulting in 457 individuals and representing all resequenced *A. tuberculatus* whole genomes ( $n$  of SNPs = 1,269,007). We used faststructure (46) to infer individual-level ancestry, taking the proportion of an individual's assignment to a grouping at  $K=2$  to represent either var. *rudis* or var. *tuberculatus* ancestry. An individual's proportion of var. *rudis* ancestry was then analyzed in a multivariate regression that tested how well var. *rudis* ancestry was explained by longitude, latitude, environment (natural or agricultural), timespan (1800-1920 [ $n=39$ ], 1920-1980 [ $n=44$ ],

1920-2020 [n=374]), a two-way timespan by longitude interaction, a two-way timespan by state interaction, and a three-way timespan by environment by longitude interaction (Individual ancestry assignment ~ longitude + latitude + environment + timespan + timespan:longitude + timespan:state + timespan:environment:longitude)

We also used plink to perform a principal-component analysis of merged SNPs from just herbarium samples (**Fig S12**) and all 457 samples jointly (**Fig S13**).

We were interested in the distribution of var. *rudis* ancestry across the genome, and so used LAMP (65) to assign ancestry to SNPs, based on two reference populations homogenous for either var. *rudis* or var. *tuberculatus* ancestry (Kansas and Ontario Natural Populations, respectively; (45)). Ancestry informative SNPs were those with an  $F_{ST} > 0.40$  (2x the mean genome-wide ancestry differentiation between varieties, in these two populations) between these reference populations and that were also in common between datasets (<20% of samples with missing data) after merging historical sequences with the contemporary paired sequence data (24). Since LAMP requires recombination rate information, we also imputed the LD-based genetic map from (45) to the ancestry-informative SNPs to get genetic distance between each. Finally, we performed the LAMP analysis, one population at a time, one scaffold at a time. After merging SNP-wise ancestry assignments across scaffolds, we calculated the mean, 5%, and 95% quantile of var. *rudis* ancestry in 100 kb regions for each population, and eventually, each environment (**Fig S10**).

To understand the relationship between ancestry, agricultural selection, and genomic architecture, we performed a multiple regression to quantify drivers of fine-scale ancestry across the genome. We regressed the individual proportion of var. *rudis* ancestry in 100 kb windows across the genome against gene density, recombination rate, scaffold, environment, average CMH score, average XPEHH (difference in extended haplotype homozygosity across environments), the interaction between environment and average CMH score in each window, and the interaction between environment and the mean XPEHH in each window (100kb mean ancestry ~ scaffold + mean gene density + mean recomb + mean xpehh:env + mean cmh:env + env). The least squares effect of environment on ancestry was taken to calculate the average difference in ancestry between agricultural and natural environments.

Tables S1 to S5



**Table S1.** GO Enrichment results for the top 0.1% CMH outliers (n=7264 SNPs, 1650 orthologous genes in *Arabidopsis thaliana*).

| GO biological process complete                           | Expected Alleles | Fold Enrichment | Bonferroni corrected p-value |
|----------------------------------------------------------|------------------|-----------------|------------------------------|
| anatomical structure formation involved in morphogenesis | 15.41            | 2.4             | 0.0161                       |
| anatomical structure development                         | 322.07           | 1.3             | 7.59E-05                     |
| developmental process                                    | 352.41           | 1.31            | 2.19E-06                     |
| post-embryonic development                               | 138.32           | 1.46            | 7.06E-04                     |
| multicellular organism development                       | 264.29           | 1.32            | 2.47E-04                     |
| multicellular organismal process                         | 284.88           | 1.3             | 6.92E-04                     |
| reproductive structure development                       | 121.64           | 1.45            | 9.21E-03                     |
| reproductive system development                          | 121.76           | 1.45            | 9.33E-03                     |
| system development                                       | 223.18           | 1.33            | 3.46E-03                     |
| reproductive process                                     | 160.77           | 1.38            | 9.11E-03                     |
| reproduction                                             | 162.39           | 1.37            | 1.52E-02                     |
| response to light stimulus                               | 123.57           | 1.42            | 2.14E-02                     |
| response to radiation                                    | 126.22           | 1.46            | 3.33E-03                     |
| response to abiotic stimulus                             | 249.49           | 1.35            | 6.75E-05                     |
| response to stimulus                                     | 562.59           | 1.24            | 1.55E-07                     |
| organic cyclic compound metabolic process                | 184.54           | 1.32            | 4.77E-02                     |
| organic substance metabolic process                      | 589.08           | 1.19            | 1.37E-04                     |
| metabolic process                                        | 649.69           | 1.2             | 6.38E-07                     |
| regulation of cellular metabolic process                 | 190.98           | 1.32            | 3.73E-02                     |
| regulation of cellular process                           | 375.46           | 1.23            | 5.85E-03                     |
| regulation of biological process                         | 456.6            | 1.21            | 2.30E-03                     |
| biological regulation                                    | 498.73           | 1.22            | 9.43E-05                     |
| regulation of metabolic process                          | 237.21           | 1.29            | 2.52E-02                     |
| cellular response to stimulus                            | 234.8            | 1.3             | 1.16E-02                     |
| cellular process                                         | 919.46           | 1.2             | 1.11E-15                     |
| response to chemical                                     | 308.77           | 1.29            | 2.83E-04                     |
| cellular metabolic process                               | 573              | 1.22            | 7.54E-07                     |
| nitrogen compound metabolic process                      | 423.67           | 1.21            | 8.41E-03                     |
| primary metabolic process                                | 487.78           | 1.17            | 4.62E-02                     |

**Table S2.** Gene and orthologue information for the 50 SNPs with the most significant CMH p-values, sorted by Scaffold and then CMH p-value. AMATA=*Amaranthus*

1054 *tuberculatus*, AT=*Arabidopsis thaliana*.  
1055

| Scaffold | Position | CMH p-value | AMATA gene | AT gene     | Orthologue                                                    | Blastn                          |
|----------|----------|-------------|------------|-------------|---------------------------------------------------------------|---------------------------------|
| 1        | 59264411 | 6.08E-10    | 2592       | NA          | Na                                                            | Nuclear Fusion Defective 4-like |
| 1        | 55158523 | 3.29E-09    | 2285       | At4g34215   | SGNH-hydrolase                                                |                                 |
| 1        | 54510509 | 8.91E-09    | 2244       | NA          | NA                                                            | NA                              |
| 1        | 12324718 | 1.93E-07    | 825        | AT5G09550.1 | Guanosine nucleotide diphosphate dissociation inhibitor (GDI) |                                 |
| 1        | 64789405 | 2.39E-07    | 3031       | AT4G38380.4 | Protein DETOXIFICATION 452C chloroplastic (DTX45)             |                                 |
| 10       | 15265237 | 7.25E-08    | 22183      | NA          | NA                                                            | NA                              |
| 10       | 26222541 | 1.03E-07    | 22540      | AT3G29385.1 | Dentin sialophosphoprotein-like protein                       |                                 |
| 10       | 5374087  | 2.74E-07    | 21789      | NA          | N NA                                                          | NA                              |
| 11       | 24079642 | 8.55E-11    | 25990      | AT5G63460.1 | Lower temperature 1                                           |                                 |
| 11       | 24078348 | 3.09E-10    | 25990      | AT5G63460.1 | Lower temperature 1                                           |                                 |
| 11       | 24086055 | 1.10E-09    | 25990      | AT5G63460.1 | Lower temperature 1                                           |                                 |
| 11       | 24006946 | 2.18E-09    | 25984      | AT5G14220.4 | <b>PPO2</b>                                                   |                                 |
| 11       | 24062979 | 2.36E-09    | 25989      | AT5G50380.1 | Exocyst complex component EXO70B1                             |                                 |
| 11       | 24080739 | 4.33E-09    | 25990      | AT5G63460.1 | Lower temperature 1                                           |                                 |
| 11       | 32783081 | 7.71E-09    | 26623      | NA          | NA                                                            |                                 |
| 11       | 24048769 | 1.30E-08    | 25988      | AT4G14110.1 | COP9 signalosome complex subunit 8 (CSN8)                     |                                 |
| 11       | 24047019 | 4.13E-08    | 25988      | AT4G14110.1 | COP9 signalosome complex subunit 8 (CSN8)                     |                                 |
| 11       | 24083434 | 4.40E-08    | 25990      | AT5G63460.1 | Lower temperature 1                                           |                                 |
| 11       | 24070607 | 4.79E-08    | 25989      | AT5G50380.1 | Exocyst complex component EXO70B1                             |                                 |
| 11       | 26024805 | 1.35E-07    | 26127      | AT1G75125.1 | Plastid transcriptionally active protein                      |                                 |
| 11       | 25369807 | 1.47E-07    | 26088      | AT5G39610.1 | Nucleobase-ascorbate transporter 6 (NAC6)                     |                                 |
| 11       | 24021382 | 1.69E-07    | 25985      | AT5G16550.1 | Ldap interacting protein                                      |                                 |
| 11       | 24024155 | 1.69E-07    | 25985      | AT5G16550.2 | Ldap interacting protein                                      |                                 |
| 11       | 24048722 | 2.07E-07    | 25988      | AT4G14110.1 | Constitutive photomorphogenic 9                               |                                 |
| 11       | 24046969 | 2.55E-07    | 25988      | AT4G14110.1 | Constitutive photomorphogenic 9                               |                                 |
| 12       | 29335314 | 7.69E-10    | 24987      | ATMG00310.1 | Orf154                                                        |                                 |
| 12       | 29335422 | 3.09E-09    | 24987      | ATMG00310.1 | Orf154                                                        |                                 |
| 12       | 29327164 | 3.31E-09    | 24987      | ATMG00310.1 | Orf154                                                        |                                 |
| 12       | 29343299 | 1.81E-08    | 24987      | ATMG00310.1 | Orf154                                                        |                                 |
| 12       | 29336458 | 3.50E-08    | 24987      | ATMG00310.1 | Orf154                                                        |                                 |
| 12       | 29333763 | 5.83E-08    | 24987      | ATMG00310.1 | Orf154                                                        |                                 |
| 12       | 11427671 | 7.91E-08    | 24182      | NA          | NA                                                            | PPX2L                           |
| 12       | 29328119 | 1.21E-07    | 24987      | ATMG00310.1 | Orf154                                                        |                                 |
| 12       | 11429925 | 2.10E-07    | 24182      | NA          | NA                                                            | PPX2L                           |
| 12       | 29333575 | 2.30E-07    | 24987      | ATMG00310.1 | Orf154                                                        |                                 |
| 12       | 29333622 | 2.30E-07    | 24987      | ATMG00310.2 | Orf155                                                        |                                 |
| 13       | 35715956 | 8.71E-09    | 19321      | NA          | Calmodulin (Physarum polycephalum OX%253D5791)                |                                 |
| 13       | 38847060 | 6.31E-08    | 19605      | NA          | NA                                                            | WIP2-like protein               |
| 13       | 26858220 | 8.73E-08    | 18867      | NA          | NA                                                            | NA                              |
| 13       | 33084574 | 1.93E-07    | 19117      | AT4G14310.2 | KIN14B-interacting protein                                    |                                 |
| 13       | 41600578 | 2.63E-07    | 19862      | AT3G24160.1 | Putative type 1 membrane protein                              |                                 |
| 2        | 53114550 | 8.86E-08    | 5599       | NA          | NA                                                            | NA                              |
| 2        | 10688517 | 9.38E-08    | 3997       | AT3G09630.1 | Suppressor of acaulis 56 (sac56)                              |                                 |
| 3        | 4797458  | 8.95E-09    | 6345       | NA          | NA                                                            | ATHB13                          |
| 3        | 1072396  | 9.09E-09    | 5998       | AT1G23820.1 | Spermidine synthase 1                                         |                                 |
| 3        | 1072448  | 8.96E-08    | 5998       | AT1G23820.1 | Spermidine synthase 1                                         |                                 |
| 3        | 16438213 | 1.27E-07    | 7059       | AT1G10150.1 | Carbohydrate-binding protein                                  |                                 |
| 3        | 5632229  | 1.80E-07    | 6414       | AT4G09650.1 | Atp synthase delta-subunit gene (atpd)                        |                                 |
| 6        | 18669007 | 1.54E-07    | 15047      | AT4G35830.1 | Aconitase 1 (ACO1)                                            |                                 |
| 8        | 15398786 | 1.13E-08    | 20978      | AT3G14310.1 | Pectin methylesterase 3                                       |                                 |

1056  
1057  
1058 **Table S3.** Selection-migration differentiation statistics for 8 resistance alleles, along with  
1059 estimates of selection estimated by logistic regression of the allele frequency through  
1060 time. Ag, agricultural sites; Nat, natural sites. Cost and benefit estimates shown here for

the additive ( $h=0.5$ ) case.  $s$  (1960-2018) represents the maximum likelihood estimate of selection from the binomial sampling equation of allele frequency change based on a diploid model of selection, and we provide the associated 95% credible interval.

|                 | Ag Freq | Nat Freq | Ag Benefit (s/m <sub>s</sub> ) | Nat Cost (s/m <sub>s</sub> ) | Cost/Ben | $s$ (1960-2018) | 95% CI of $s$        |
|-----------------|---------|----------|--------------------------------|------------------------------|----------|-----------------|----------------------|
| <b>PPOdel</b>   | 0.334   | 0.0464   | 2.58582                        | 12.9997                      | 5.027303 | 1.16            | 0.194, $\infty$      |
| <b>EPSPSamp</b> | 0.496   | 0.236    | 2.08013                        | 2.88402                      | 1.386461 | NA              | NA                   |
| <b>EPSPS106</b> | 0.127   | 0.087    | 0.721559                       | 1.00716                      | NA       | 1.12            | 0.106, $\infty$      |
| <b>ALS122</b>   | 0.0301  | 0        | NA                             | NA                           | NA       | -0.01           | $-\infty$ , $\infty$ |
| <b>ALS197</b>   | 0.0132  | 0.0169   | NA                             | NA                           | NA       | 0.286           | $-\infty$ , $\infty$ |
| <b>ALS574</b>   | 0.337   | 0.191    | 1.30689                        | 1.88974                      | 1.445982 | 0.09            | 0.088, 0.334         |
| <b>ALS376</b>   | 0.0824  | 0.0358   | 1.23264                        | 2.70001                      | NA       | 0.59            | 0.046, $\infty$      |
| <b>ALS653</b>   | 0.0596  | 0.0627   | -0.11062                       | -0.105498                    | NA       | 0.55            | 0.058, $\infty$      |

**Table S4.** The top 15 loci with the strongest evidence of temporal selection between 1970 and 2018.

| $s$   | $s$ p-value | AF s(SE) change | scaf        | position | AMATA annotated gene    | AT orthologue                                                   | AT gene name |
|-------|-------------|-----------------|-------------|----------|-------------------------|-----------------------------------------------------------------|--------------|
| 0.106 | 4.680E-04   | 0.030 0.846     | Scaffold_11 | 26068182 | AMATA_chromosomes_26131 | NA                                                              | NA*          |
| 0.081 | 1.081E-04   | 0.021 0.823     | Scaffold_2  | 10755264 | AMATA_chromosomes_03999 | Subtilase family protein                                        | AT5G58840    |
| 0.057 | 2.382E-03   | 0.019 0.512     | Scaffold_10 | 22995135 | AMATA_chromosomes_22407 | phosphotyrosyl phosphatase activator (PTPA family protein)      | AT4G08960    |
| 0.052 | 8.211E-03   | 0.020 0.402     | Scaffold_11 | 26024805 | AMATA_chromosomes_26127 | plastid transcriptionally active protein                        | AT1G75125*   |
| 0.052 | 6.084E-05   | 0.013 0.646     | Scaffold_3  | 14213167 | AMATA_chromosomes_06976 | WRKY DNA-binding protein 13                                     | AT4G39410    |
| 0.047 | 2.549E-07   | 0.009 0.783     | Scaffold_10 | 36863790 | AMATA_chromosomes_23250 | hypothetical protein                                            | AT1G36320    |
| 0.046 | 1.272E-01   | 0.030 0.162     | Scaffold_3  | 49332690 | AMATA_chromosomes_08117 | NA                                                              | NA           |
| 0.045 | 2.889E-05   | 0.011 0.677     | Scaffold_6  | 18669007 | AMATA_chromosomes_15047 | ACO1                                                            | AT4G35830    |
| 0.043 | 8.557E-05   | 0.011 0.599     | Scaffold_12 | 21792253 | AMATA_chromosomes_24760 | NA                                                              | NA           |
| 0.043 | 4.601E-08   | 0.008 0.888     | Scaffold_3  | 5632229  | AMATA_chromosomes_06414 | ATPD (F-type H <sup>+</sup> -transporting ATPase subunit delta) | AT4G09650    |
| 0.036 | 8.069E-06   | 0.008 0.666     | Scaffold_12 | 5658420  | AMATA_chromosomes_23853 | NA                                                              | NA           |
| 0.033 | 4.729E-07   | 0.007 0.831     | Scaffold_10 | 20690917 | AMATA_chromosomes_22321 | CCB2 (chaperone DUF2930)                                        | AT5G52110    |
| 0.032 | 1.755E-07   | 0.006 0.819     | Scaffold_10 | 16005835 | AMATA_chromosomes_22202 | NA                                                              | NA           |
| 0.032 | 3.939E-05   | 0.008 0.708     | Scaffold_10 | 24312710 | AMATA_chromosomes_22452 | BPA4 (RNA-binding RRM/RBD/RNP motifs family protein, AT1G14340) | AT1G14340    |
| 0.031 | 5.175E-06   | 0.007 0.764     | Scaffold_2  | 17891465 | AMATA_chromosomes_04209 | NA                                                              | NA           |

\* ~2 Mb from PPO

**Table S5.** Metadata on herbarium collections.

| Sample | Herbarium | Year | State | County/Locality | Description | Nat/Ag/Dist | Lat | Long | Catalog # |
|--------|-----------|------|-------|-----------------|-------------|-------------|-----|------|-----------|
|--------|-----------|------|-------|-----------------|-------------|-------------|-----|------|-----------|

|        |      |      |          |                                  |                                                                                               |      |             |             |             |
|--------|------|------|----------|----------------------------------|-----------------------------------------------------------------------------------------------|------|-------------|-------------|-------------|
| HBO900 | INHS | 1876 | Illinois | Oquawka                          | Banks of the Mississippi                                                                      | Nat  | 40.900098   | -90.991298  | 1           |
| HBO901 | INHS | 1870 | Illinois | Kankakee                         | Wet Banks                                                                                     | Nat  | 41.154318   | -87.919365  | 2           |
| HBO902 | INHS | 1875 | Illinois | Oquawka                          | Banks of the Mississippi                                                                      | Nat  | 40.900098   | -90.991298  | 3           |
| HBO903 | INHS | 1897 | Illinois | Warrenville                      | Mudflats                                                                                      | Nat  | 41.823199   | -88.174393  | 6           |
| HBO904 | INHS | 1892 | Illinois | Chicago                          | Waste Ground ("Exposition Building")                                                          | Dist | 41.779452   | -87.61641   | 7 (429)     |
| HBO907 | INHS | 1897 | Illinois | Chicago                          | Dumping ground, Brighton Park                                                                 | Dist | 41.818787   | -87.706608  | 10          |
| HBO908 | INHS | 1952 | Illinois | Fithian, Vermilion County        | Along railroad                                                                                | Dist | 40.114645   | -87.875056  | 11 (56279)  |
| HBO909 | INHS | 1946 | Illinois | Gardenplain, Whiteside County    | Peat soil in potato field, "L.C. Anderson Farm"                                               | Ag   | 41.782572   | -90.138152  | 12 (19934)  |
| HBO910 | INHS | 1948 | Illinois | W of Antioch, Lake County        | Disturbed soil                                                                                | Dist | 42.481444   | -88.157622  | 13 (32479)  |
| HBO911 | INHS | 1947 | Illinois | W of Gillespie, Macoupin County  | Corn field                                                                                    | Ag   | 39.127901   | -89.860508  | 14 (22536)  |
| HBO912 | INHS | 2005 | Illinois | Minooka Rd & Route I-80, Minooka | Disturbed moist cropland margin near sable creek                                              | Ag   | 41.457917   | -88.308444  | 15 (242814) |
| HBO913 | INHS | 2000 | Illinois | Cooperstown, Brown County        | Former marsh in partly filled obow, mostly used as corn fields                                | Ag   | 39.959059   | -90.611708  | 16 (205271) |
| HBO914 | MBDH | 1895 | Ohio     | Fulton Co.                       | Cornfield along the new river improvement on the prairie                                      | Ag   | 41.67333333 | 84.32694444 | 357         |
| HBO915 | MBDH | 1903 | Ontario  | Essex Co.                        | NA                                                                                            | NA   | 41.772246   | -82.79184   | 265         |
| HBO916 | MBDH | 1955 | Ohio     | Greene Co.                       | Front lawn of Campus house                                                                    | Dist | 39.82083333 | 84.01944444 | 292         |
| HBO917 | MBDH | 1956 | Ohio     | Mercer Co.                       | Roadside, edge of soybean field                                                               | Ag   | 40.67861111 | 84.51861111 | 197         |
| HBO918 | MBDH | 1991 | Ohio     | Putnam Co.                       | Weedy ground alongside Blanchard River                                                        | Nat  | 41.03944444 | 84.15694444 | 253         |
| HBO919 | IUH  | 1898 | Indiana  | Lake                             | on ballast (railroad bed)                                                                     | Dist | 41.602259   | -87.25837   | IND-0088703 |
| HBO920 | IUH  | 1941 | Indiana  | Vanderburgh                      | cultivated ground                                                                             | Ag   | 37.870283   | -87.634147  | IND-0088729 |
| HBO921 | IUH  | 1941 | Indiana  | Vanderburgh                      | field north of river slough                                                                   | Ag   | 37.979365   | -87.544518  | IND-0088730 |
| HBO922 | IUH  | 1952 | Indiana  | Johnson                          | Low cornfield                                                                                 | Ag   | 39.482726   | -86.019624  | IND-0088699 |
| HBO923 | IUH  | 2007 | Indiana  | Vigo                             | Mesic loam plain fallow cropland with successional weeds                                      | Ag   | 39.43257    | -87.380135  | IND-0088738 |
| HBO924 | KUMH | 1897 | Missouri | Jackson, Courtney                | Common along river                                                                            | Nat  | 39.15556    | -94.39333   | 176647      |
| HBO925 | KUMH | 1913 | Kansas   | Doniphan,                        | Mesophytic oat field.                                                                         | Ag   | 39.813187   | -95.160615  | 43812       |
| HBO926 | KUMH | 1913 | Kansas   | Doniphan,                        | Mesophytic oat field.                                                                         | Ag   | 39.813187   | -95.160615  | 43965       |
| HBO927 | KUMH | 1949 | Kansas   | Shawnee, Lake Shawnee            | Dry grassland.                                                                                | Nat  | 39.000784   | -95.626093  | 43811       |
| HBO928 | KUMH | 1940 | Kansas   | Douglas, Lawrence                | Field.                                                                                        | Ag   | 38.9365     | -95.22391   | 44000       |
| HBO929 | KUMH | 1970 | Kansas   | Chautauqua, Peru                 | Low, cultivated field. Gumbo soil.                                                            | Ag   | 37.09524    | -96.07752   | 43956       |
| HBO930 | KUMH | 1973 | Kansas   | Allen, Elsmore                   | Roadside right of way along field. Weedy, good soil.                                          | Ag   | 37.79382    | -95.16832   | 43987       |
| HBO931 | KUMH | 1981 | Kansas   | Doniphan, Denton                 | Edge of cultivated field.                                                                     | Ag   | 39.70289    | -95.30739   | 43933       |
| HBO932 | KUMH | 1994 | Kansas   | Labette, Parsons                 | Disturbed roadside along bean field and adjacent woodlands to the S. (scattered pop in field) | Ag   | 37.29416    | -95.210223  | 111589      |
| HBO933 | ROM  | 1891 | Ontario  | NA                               | Leading to the H null Cemetery                                                                | Dist | 43.892294   | -81.312444  | 447         |
| HBO934 | ROM  | 1889 | Ontario  | Wingham                          | Alluvial soil (wet soil)                                                                      | Nat  | 43.89161    | -81.312795  | 189975      |
| HBO935 | ROM  | 1880 | Ontario  | London                           | Fields                                                                                        | Ag   | 42.954827   | -81.234897  | 188334      |
| HBO936 | ROM  | 1891 | Ontario  | Leasselman                       | Alluvium along the Nation River                                                               | Nat  | 45.319337   | -75.093578  | 438         |

|        |     |      |          |                                                                         |                                                                              |      |           |            |             |
|--------|-----|------|----------|-------------------------------------------------------------------------|------------------------------------------------------------------------------|------|-----------|------------|-------------|
| HBO937 | ROM | 1880 | Ontario  | North Branch, London                                                    | Low River Flats                                                              | Nat  | 43.04267  | -81.175264 | 441         |
| HBO938 | ROM | 1940 | Ontario  | New Durham, Brant Co                                                    | Edge of Field                                                                | Ag   | 43.04956  | -80.523938 | 129548      |
| HBO939 | ROM | 1960 | Ontario  | Dunnville, Haldimand Co                                                 | Wasteground by Lake Erie                                                     | Dist | 42.86879  | -79.617923 | 159479      |
| HBO940 | ROM | 1950 | Ontario  | Kent Co                                                                 | Wet sand at Rankin creek near Mitchell Bay                                   | Nat  | 42.48877  | -82.413605 | 80.118      |
| HBO941 | ROM | 1960 | Ontario  | Grenville Co, ON                                                        | Muddy shore of South Nation River                                            | Nat  | 44.828922 | -75.554629 | 134207      |
| HBO942 | ROM | 1986 | Ontario  | Walpole Island                                                          | Disturbed forest/tall grass prairie - swampy                                 | Nat  | 42.568369 | -82.504545 | TRT00029148 |
| HBO943 | ROM | 1991 | Ontario  | Louth Twp., Niagara RM                                                  | W Shoreline of Jordan Marsh                                                  | Nat  | 43.174444 | -79.375015 | 246184      |
| HBO944 | ROM | 1985 | Ontario  | Ottawa-Carleton                                                         | Silty wet sand in dried-up pond in old pasture                               | Dist | 45.274525 | -76.088545 | 234833      |
| HBO945 | ROM | 1988 | Ontario  | Wasaga Beach                                                            | Nottawasaga R. at Jack L.                                                    | Nat  | 44.485637 | -79.99545  | 240977      |
| HBO947 | ROM | 1997 | Ontario  | Brighton Tw., Northumberland Co                                         | Sand pile, N shore of Lake Ontario                                           | Nat  | 43.997787 | -77.729332 | 256250      |
| HBO948 | ROM | 1990 | Ontario  | Wingham                                                                 | Riverbanks                                                                   | Nat  | 43.89161  | -81.312795 | 27813       |
| HBO949 | ROM | 1880 | Ontario  | N.B. London                                                             | River flat                                                                   | Nat  | 43.083152 | -81.166767 | 85.246      |
| HBO950 | UMH | 2001 | Michigan | Lenawee Co                                                              | Open roadside at edge of cornfield, S side of Lime Creek Rd, w of Rogers Hwy | Ag   | 41.766065 | -84.227971 | 1209687     |
| HBO951 | UMH | 1909 | Michigan | near Port Huron                                                         | Invading cultivated fields as a weed, abundant                               | Ag   | 42.979577 | -82.470627 | 1209704     |
| HBO952 | UMH | 1897 | Illinois | Warrenville                                                             | Mud flats                                                                    | Nat  | 41.829751 | -88.177826 | 1559076     |
| HBO953 | UMH | 1883 | Ohio     | Cincinnati                                                              | NA                                                                           | NA   | 39.136053 | -84.502294 | 1207957     |
| HBO954 | UMH | 1833 | Ohio     | North Bend, Cincinnati                                                  | Sandy beach of Ohio River                                                    | Nat  | 39.14757  | -84.753428 | 1207929     |
| HBO955 | UMH | 1932 | Ontario  | Little Current, Manitoulin Island                                       | In open fields                                                               | Ag   | 45.966667 | -81.933333 | 1208039     |
| HBO956 | UMH | 1986 | Ontario  | Essex Co, Malden Twp                                                    | Big creek marsh                                                              | Nat  | 42.05088  | -83.056715 | 1208029     |
| HBO957 | UMH | 1946 | Illinois | Sangamon Co                                                             | Woods                                                                        | Nat  | 39.578464 | -89.730027 | 1208025     |
| HBO958 | UMH | 1989 | Ontario  | N Plantagenet Ip, Jessup's Falls (South Nation PP), Hwy 17 @ S Nation R | Rockshore protection and waste ground along river                            | Dist | 45.559302 | -75.064719 | 1207959     |
| HBO959 | UMH | 1882 | Illinois | Riverside                                                               | Gravelly, dry bed of Des Plaines River                                       | Nat  | 41.826723 | -87.82569  | 1559075     |
| HBO961 | UMH | 1949 | Illinois | Champaign Co                                                            | Mud and sand at bottom of a ditch                                            | Dist | 40.061911 | -88.105443 | 1559082     |
| HBO962 | UMH | 1993 | Ontario  | Middlesex Co, Lobo Twp,                                                 | Komoka Creek Swamp near Thames River, Edge of Thames                         | Nat  | 42.917996 | -81.441417 | 1207956     |
| HBO963 | UMH | 1995 | Ontario  | Niagara Regional Municipality, Niagara Falls Twp                        | Moist disturbed ground near railway tracks                                   | Dist | 43.06736  | -79.084574 | 1208030     |
| HBO964 | MO  | 1877 | Illinois | Saint Clair                                                             | Low places                                                                   | Nat  | 38.55     | -89.916667 | 1740835     |
| HBO965 | MO  | 1889 | Missouri | St. Louis City                                                          | NA                                                                           | NA   | 38.62975  | -90.242434 | 1740859     |
| HBO966 | MO  | 1893 | Illinois | Saint Clair                                                             | Low places                                                                   | Nat  | 38.509011 | -90.177817 | 1740847     |
| HBO967 | MO  | 1897 | Illinois | Warrenville                                                             | Mudflats *note: same pop/date/collector as #93                               | Nat  | 41.829751 | -88.177826 | 38973       |
| HBO968 | MO  | 1902 | Illinois | Saint Clair                                                             | Wet plains in East St Louis                                                  | Nat  | 38.625    | -90.16     | 1740833     |
| HBO969 | MO  | 1912 | Missouri | St. Louis City                                                          | In open field                                                                | Ag   | 38.603097 | -90.257021 | 778075      |
| HBO960 | MO  | 1919 | Illinois | Pope                                                                    | Muddy banks of Ohio River                                                    | Nat  | 37.364829 | -88.482798 | 853159      |
| HBO970 | MO  | 1925 | Illinois | Lake                                                                    | Wet open ground, borders of tamarack swamp                                   | Nat  | 42.370872 | -88.121862 | 940825      |



|        |      |      |          |                     |                                                                                                   |      |           |            |            |
|--------|------|------|----------|---------------------|---------------------------------------------------------------------------------------------------|------|-----------|------------|------------|
| HBO971 | MO   | 1927 | Missouri | St. Louis           | Mo River Sand Bar                                                                                 | Nat  | 38.595548 | -90.767735 | 2157288    |
|        |      |      |          |                     | In moist ground near Sugar Loaf Station, about 2 miles south of Du Po                             |      |           |            | 1026850    |
| HBO972 | MO   | 1927 | Illinois | St. Clair           |                                                                                                   | Dist | 38.495758 | -90.217877 |            |
| HBO973 | MO   | 1930 | Missouri | St. Louis           | Sandy fields                                                                                      | Ag   | 38.715451 | -90.48898  | 2157285    |
|        |      |      |          |                     | Alluvial banks along Mississippi river, 6500 South St. Louis                                      |      |           |            | 1140474    |
| HBO974 | MO   | 1933 | Missouri | St. Louis           |                                                                                                   | Nat  | 38.572701 | -90.229642 |            |
|        |      |      |          |                     | Moist thicket along Sangamon River, 15 miles west of Urbana                                       |      |           |            | 1579795    |
| HBO975 | MO   | 1940 | Illinois | Champaign           |                                                                                                   | Nat  | 40.119754 | -88.498602 |            |
| HBO976 | MO   | 1962 | Illinois | Tazwell             | Low River Bank                                                                                    | Nat  | 40.720818 | -89.597212 | 1812554    |
|        |      |      |          |                     | Bottom of Maumee River at SW corner of Maumee city Limits                                         |      |           |            | 6773122    |
| HBO977 | MO   | 1967 | Ohio     | Lucas               |                                                                                                   | Nat  | 41.542549 | -83.689433 |            |
|        |      |      |          |                     | Weedy mowed and cultivated fields and bulldozed areas                                             |      |           |            | 6113965    |
| HBO978 | MO   | 2005 | Illinois | Madison             |                                                                                                   | Ag   | 38.779167 | -89.640556 |            |
|        |      |      |          |                     | Howell Island Conservation area, huge population, in large field next to hiking trail             |      |           |            | 6449615    |
| HBO979 | MO   | 2009 | Missouri | St. Charles         |                                                                                                   | Nat  | 38.665567 | -90.70705  |            |
|        |      |      |          |                     | Dallas city public fishing access on the bank of the Mississippi River, and nearby railway tracks |      |           |            | 6443667    |
| HBO980 | MO   | 2009 | Illinois | Hancock             |                                                                                                   | Nat  | 40.634567 | -91.179467 |            |
| HBO981 | MO   | 2010 | Missouri | Montgomery          | Loutre River                                                                                      | Nat  | 38.911389 | -91.592778 | 6334467    |
|        |      |      |          |                     | Roadside through floodplain with deep alluvial sandy loam                                         |      |           |            | 6341594    |
| HBO982 | MO   | 2011 | Illinois | Randolph            |                                                                                                   | Dist | 37.923333 | -89.893333 |            |
|        |      |      |          |                     | A common weed in low and cultivated ground                                                        |      |           |            | 6773126    |
| HBO983 | MO   | 1919 | Missouri | Jasper              |                                                                                                   | Ag   | 37.204167 | -94.344167 |            |
| HBO984 | AAFC | 1892 | Ontario  | Ottawa              | NA                                                                                                | NA   | 45.289379 | -75.737232 | 1001151662 |
|        |      |      |          |                     | 3 miles East, Wet Roadside                                                                        |      |           |            |            |
| HBO985 | AAFC | 1955 | Ontario  | Richmond, Carleton  |                                                                                                   | Dist | 45.19477  | -75.78076  | 1151663    |
|        |      |      |          |                     | Shoreline of Ottawa River, moist sandy gravelly soil                                              |      |           |            |            |
| HBO986 | AAFC | 1954 | Ontario  | Rockcliffe Park     |                                                                                                   | Nat  | 45.457179 | -75.676253 | 1151664    |
| HBO987 | AAFC | 1921 | Ontario  | Ottawa              | Lac Constane                                                                                      | Nat  | 47.387012 | -77.283366 | 1151665    |
|        |      |      |          |                     | 1 mile N of York, Sand beach                                                                      |      |           |            |            |
| HBO988 | AAFC | 1951 | Ontario  | Haldimand County    |                                                                                                   | Nat  | 43.035303 | -79.897787 | 1151667    |
|        |      |      |          |                     | East beach, moist sand beach                                                                      |      |           |            |            |
| HBO989 | AAFC | 1988 | Ontario  | Essex County        |                                                                                                   | Nat  | 41.93464  | -82.505179 | 1151668    |
|        |      |      |          |                     | North shore or W End, Moist woods                                                                 |      |           |            |            |
| HBO990 | AAFC | 1998 | Ontario  | Essex County        |                                                                                                   | Nat  | 41.683999 | -82.682764 | 1151669    |
|        |      |      |          |                     | Dried bed of the Raisin River at rapids                                                           |      |           |            |            |
| HBO991 | AAFC | 1964 | Ontario  | Glengarry County    |                                                                                                   | Nat  | 45.13414  | -74.575361 | 1151671    |
|        |      |      |          |                     | Along sandy beach, Between Mississippi River & McEwan Nay.                                        |      |           |            |            |
| HBO992 | AAFC | 1949 | Ontario  | Lanarck             |                                                                                                   | Nat  | 45.046655 | -76.230997 | 1151672    |
|        |      |      |          |                     | High grass along tracks, Railyards north of the station                                           |      |           |            |            |
| HBO993 | AAFC | 1960 | Ontario  | Sarnia              |                                                                                                   | Dist | 42.957915 | -82.393943 | 1151673    |
| HBO994 | AAFC | 1937 | Ontario  | Ottawa              | Shore line, Moira Lake                                                                            | Nat  | 44.486839 | -77.458612 | 1151674    |
|        |      |      |          |                     | Muddy inundated shore of South Nation River                                                       |      |           |            |            |
| HBO995 | AAFC | 1960 | Ontario  | Grenville County    |                                                                                                   | Nat  | 44.951292 | -75.483802 | 1151675    |
|        |      |      |          |                     | Rocky Point Prov. Park, Dunville Twp.                                                             |      |           |            |            |
| HBO997 | AAFC | 1988 | Ontario  | Hald-Norfolk County |                                                                                                   | Nat  | 42.847407 | -79.555433 | 1154001    |
| HBO998 | AAFC | 1958 | Ontario  | Stormont County     | Railway tracks                                                                                    | Dist | 44.988422 | -74.996022 | 1151676    |
| HBO999 | AAFC | 1938 | Ontario  | Pelee Island        | NA                                                                                                | Nat  | 41.683999 | -82.682764 | 1154003    |
| HB1000 | AAFC | 1934 | Ontario  | Mitchell's Bay      | Waste places                                                                                      | Dist | 42.468738 | -82.407807 | 1154004    |
|        |      |      |          |                     | Edge of 1st Island below Gault                                                                    |      |           |            |            |
| HB1001 | AAFC | 1939 | Ontario  | Waterloo County     |                                                                                                   | Nat  | 43.352835 | -80.316045 | 1154005    |

|        |      |      |          |                  |                              |      |           |            |          |
|--------|------|------|----------|------------------|------------------------------|------|-----------|------------|----------|
| HB1002 | AAFC | 1918 | Ontario  | NA               | NA                           | NA   | 42.77177  | -81.197887 | 1154008  |
| HB1003 | AAFC | 1961 | Ontario  | Waterloo County  | Wet Field beside Speed River | Ag   | 43.455939 | -80.290772 | 1154009  |
| HB1004 | AAFC | 1828 | Ontario  | Middlesex County | Thames River                 | Nat  | 42.959472 | -81.309866 | 1154010  |
| HB1005 | AAFC | 1828 | Ontario  | Middlesex County | Bank of the Thames           | Nat  | 42.980389 | -81.344198 | 1154011  |
| HB1006 | AAFC | 1961 | Ontario  | Waterloo County  | Wet Field beside Speed River | Ag   | 43.455939 | -80.290772 | 1154012  |
| HB1007 | AAFC | 1966 | Ontario  | Middlesex County | Muddy soil alongside creek   | Nat  | 43.030996 | -81.349254 | 1154014  |
| HB1008 | AAFC | 1828 | Ontario  | Middlesex County | NA                           | NA   | 42.950068 | -81.435938 | 1154013  |
| HB1009 | AAFC | 1903 | Ontario  | NA               | In boggy soil                | Nat  | 43.892294 | -81.312444 | 1151660  |
| HB1010 | INHS | 1906 | Illinois | Riverdale        | Along railroad               | Dist | 41.640523 | -87.626446 | 8 (2632) |
| HB1011 | INHS | 1894 | Illinois | Wheaton          | Roadside                     | Dist | 41.864251 | -88.103346 | 9 (267)  |

1079  
1080  
1081 Figures S1 to S13  
1082  
1083

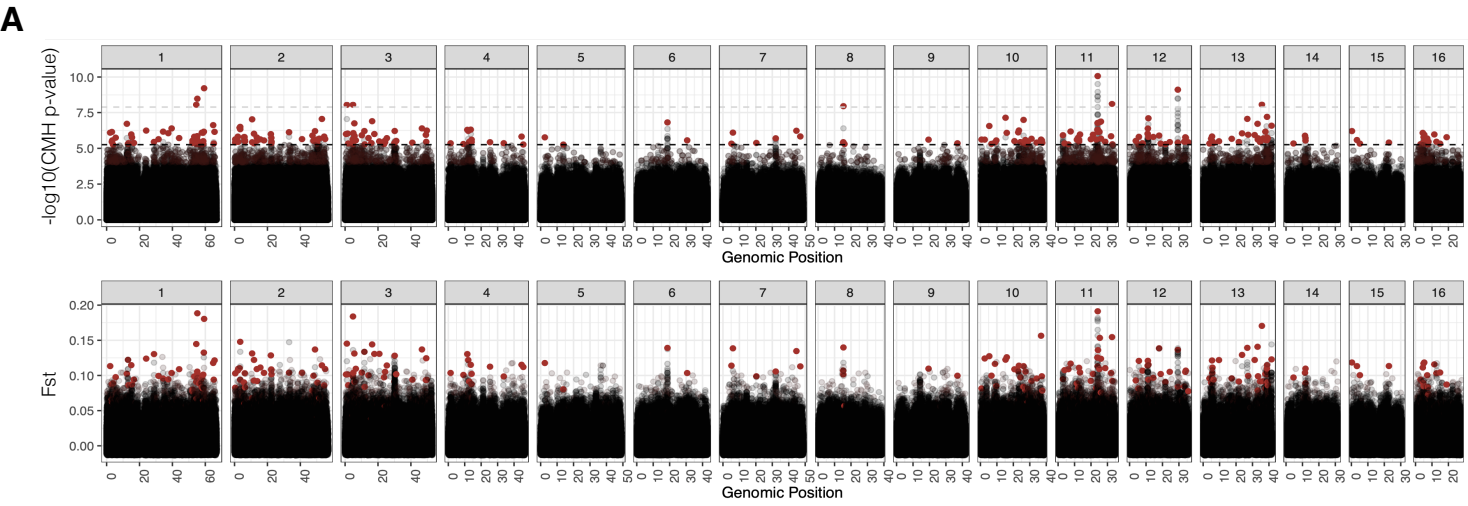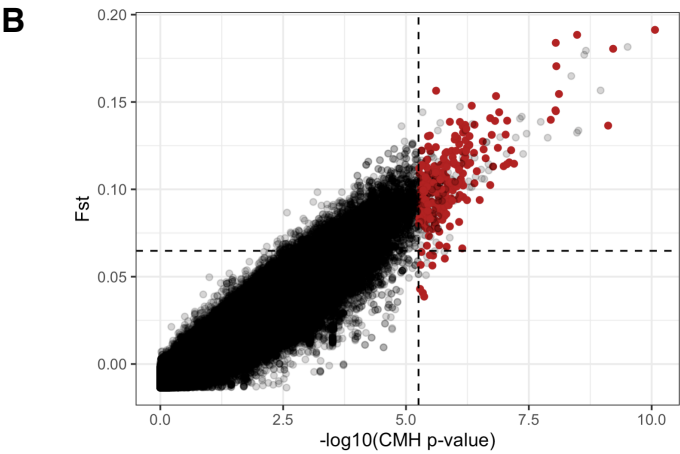

**Fig S1.** Strong congruency between results of a CMH genome-wide scan (assessing environmental differences stratifying for population pair) versus a between-environment  $F_{ST}$  genome-wide scan (differentiation among individuals pooled within natural environments and within agricultural environments). A) Two Manhattan plots showing the distribution of CMH  $-\log_{10}(p\text{-values})$  [top] and  $F_{ST}$  values at SNPs across the genome. B) Between-environment  $F_{ST}$  is plotted against the CMH  $-\log_{10}(p\text{-values})$ , showing a strong correlation (Spearman's  $\rho = 0.905$ ; Pearson's  $r$  between  $F_{ST}$  and CMH  $\chi^2 = 0.957$ ). In both A and B, red dots indicate focal putative agriculturally adaptive SNPs as inferred from the CMH scan, based on showing the strongest significance in a given 1 Mb region.

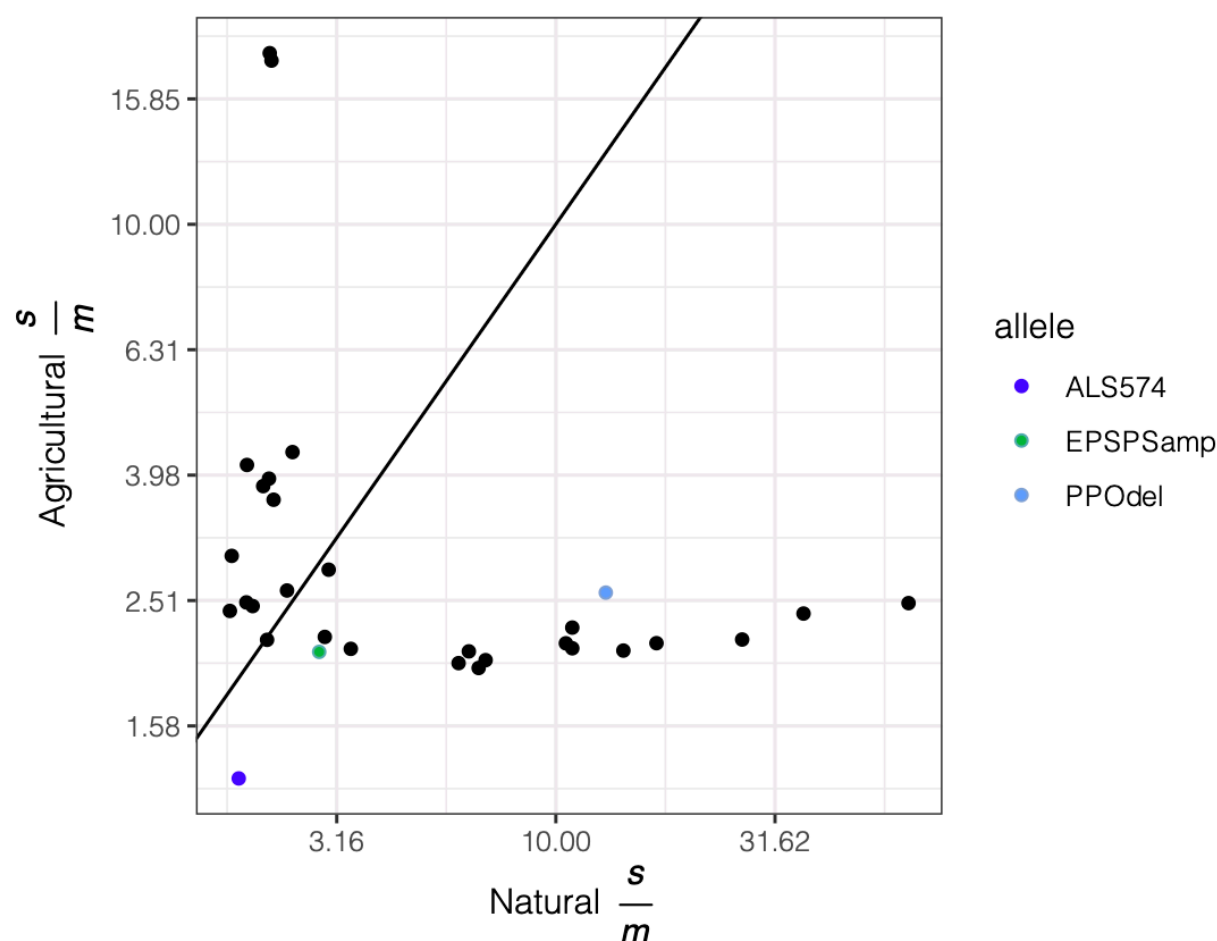

**Fig S2.** Agricultural  $\frac{s}{m}$  (representing the migration scaled selective benefit) versus natural  $\frac{s}{m}$  (representing the migration scaled selective cost) for the 30 independent loci with the most significant CMH scan hits, compared to the 3 common herbicide resistance alleles with significantly different allele frequencies among natural and agricultural environments. Diagonal line represents equal agricultural benefits compared to natural costs, scaled by migration.

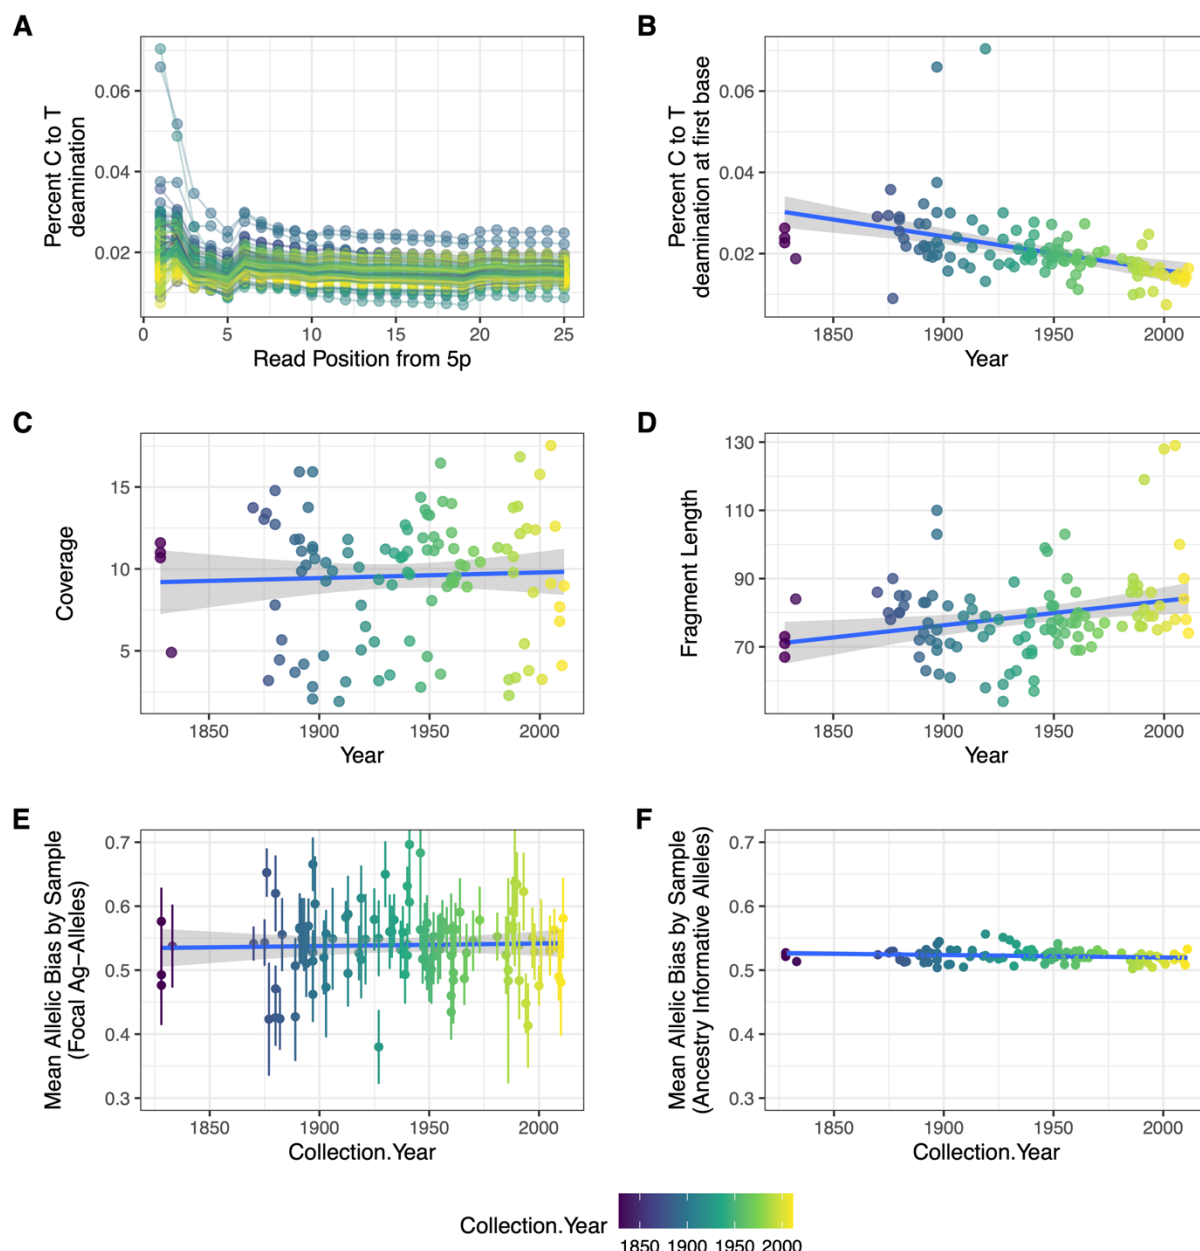

**Fig S3.** Percent C-to-T deamination by read position (A), along with the correlation of collection year with Percent C-to-T deamination at first base (B). C-D represent temporal correlates with genome-wide coverage (C), fragment length (D), mean allelic bias by sample for focal agriculture-associated alleles (E) and for ancestry informative alleles (F). For B-F, each dot represents sample-wise means for 108 sequenced herbarium specimens.

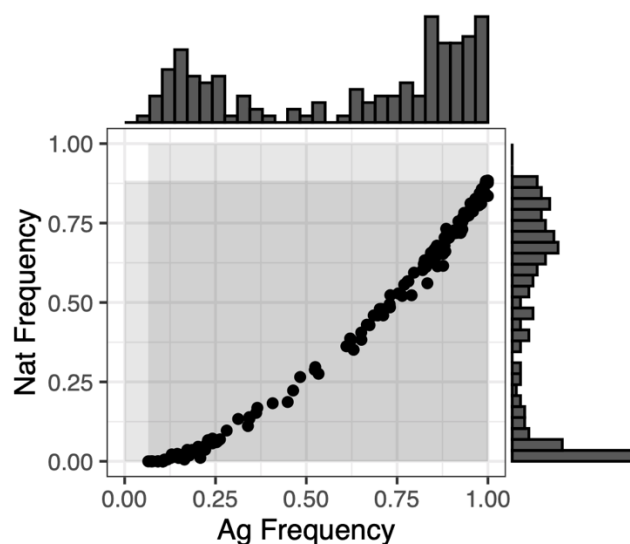

**Fig S4.** The distribution of frequencies for agriculturally adaptive alleles in agricultural samples along the x-axis, and in natural samples along the y-axis. Null distributions for an expectation of change in the frequency in our focal set of contemporary alleles was generated by producing randomized allele sets of the same size ( $n=154$ ) matching the extant agricultural-allele frequency distributions shown here, first in natural environments (top histogram), and then in agricultural environments (right histogram).

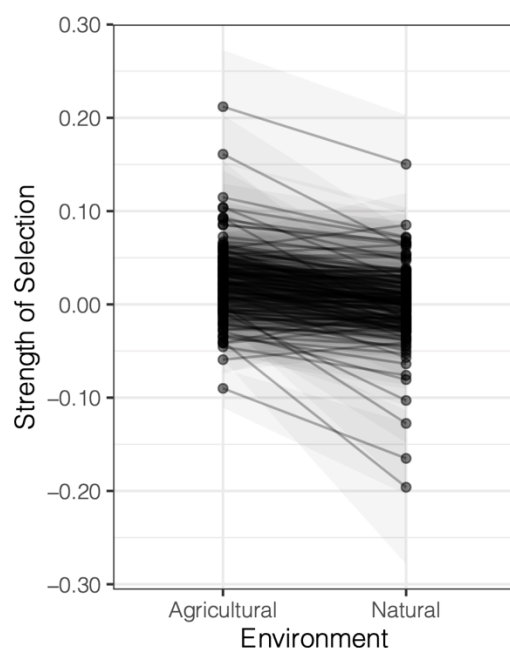

**Fig S5.** Inferred strength of selection on 154 agricultural alleles through time, in either agricultural or natural environments. Selection coefficients were extracted from logit-transformed logistic regressions of genotype on year, run separately for each locus in each environment. Gray ribbon for each locus represents the bounds of the standard error associated with the estimate of selection in each environment.



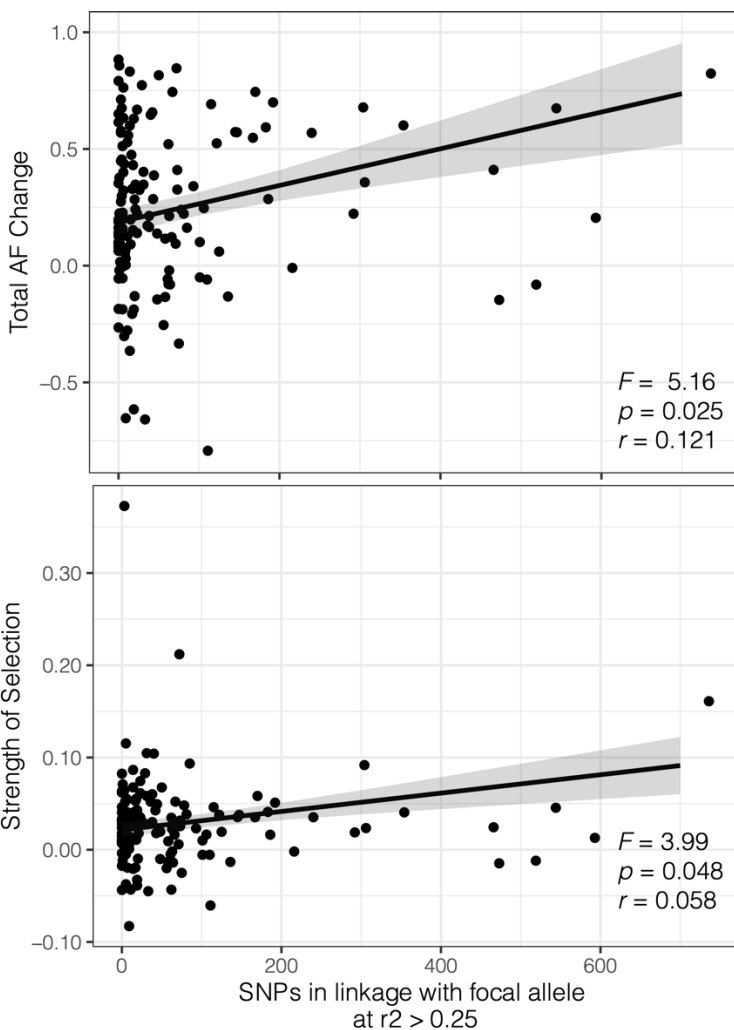

**Fig S6.** The association between contemporary patterns of linkage and selection and allele frequency change observed over the last 150 years across herbarium samples. Regression line shows the least square mean effect of contemporary linkage from a multiple regression analysis.

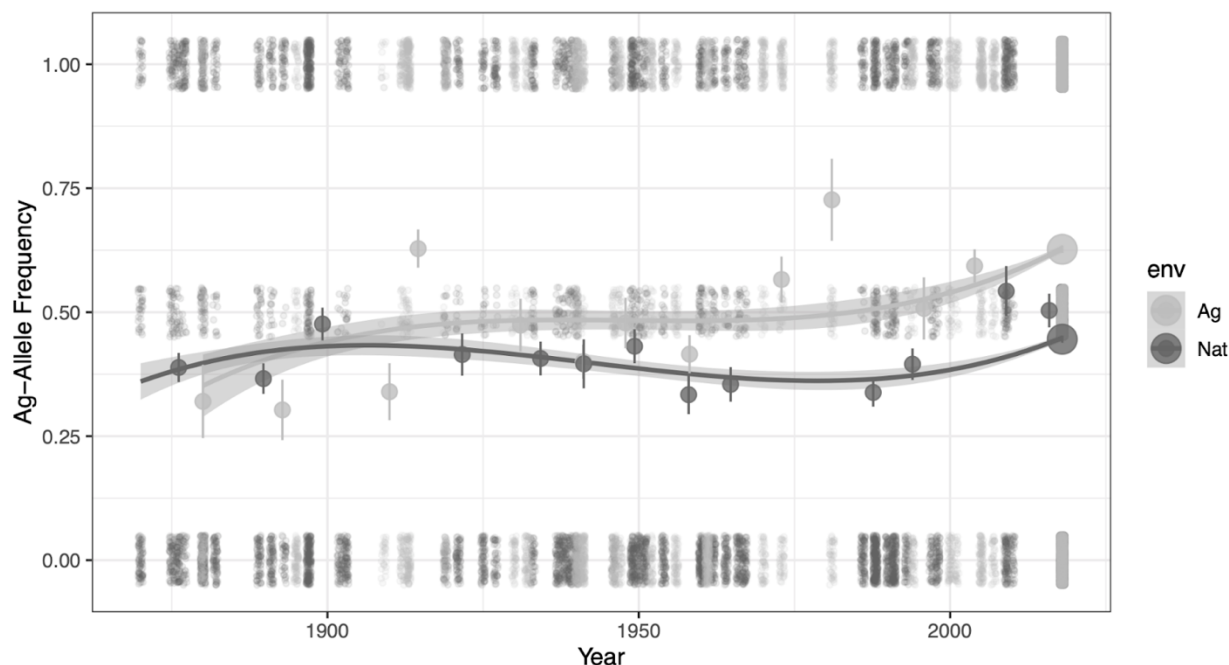

**Fig S7.** Cubic splines that illustrate the environment-specific frequency change of agricultural alleles through time since 1870. Gray ribbon denotes the 95% CI.

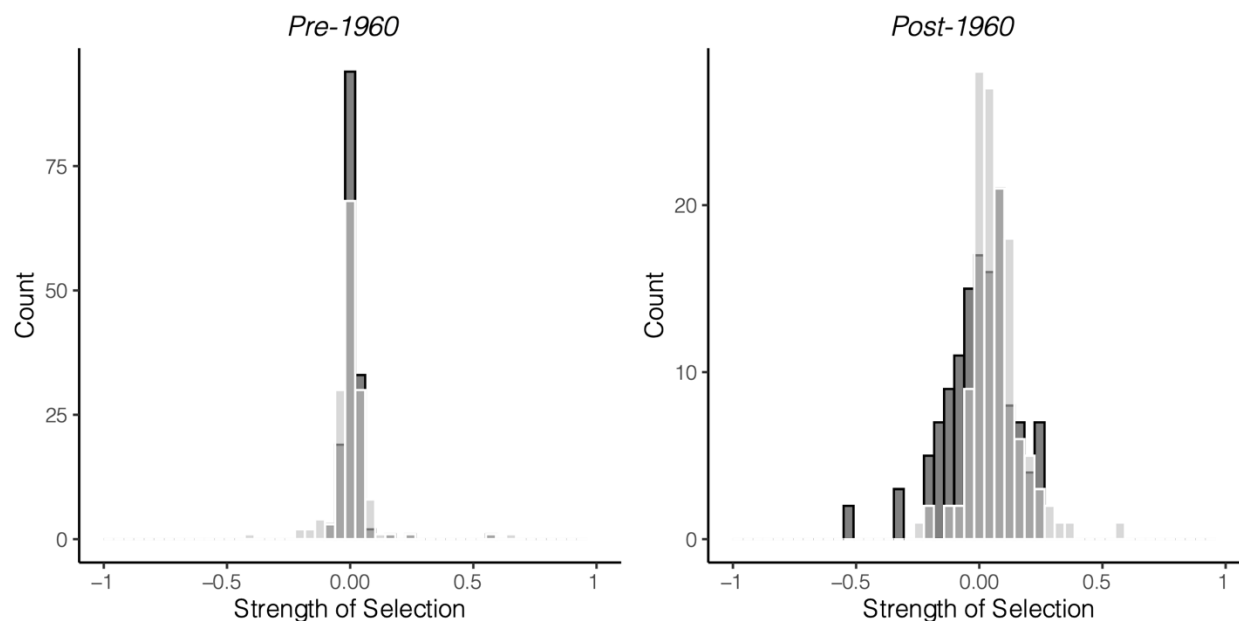

**Fig S8.** Logistic estimates of selection before (left) and after (right) the 1960s, the start of agricultural intensification, for agriculturally-associated alleles in natural (dark gray) versus agricultural and disturbed (light gray) environments.

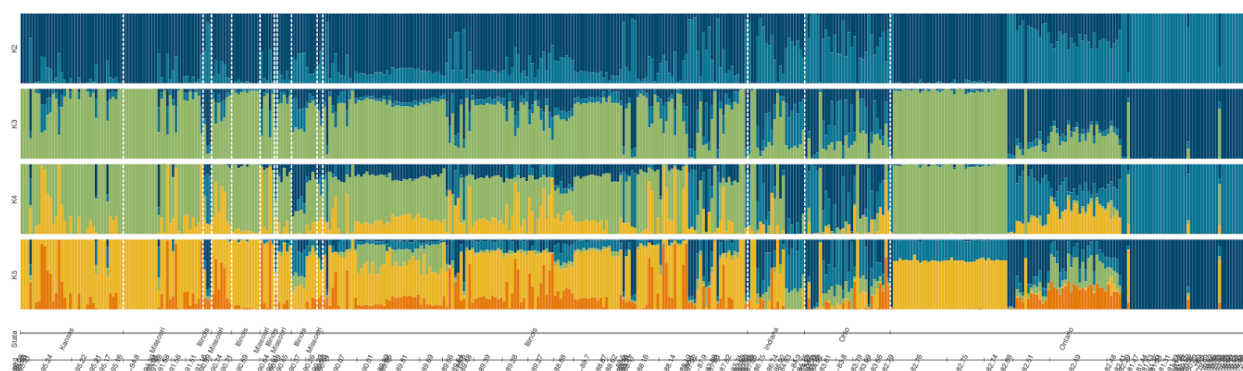

**Fig S9.** Longitudinal and state-wise patterns of ancestry across 457 *A. tuberculatus* individuals from contemporary and historical sampling, inferred from faststructure. Samples sorted by longitude, from west (left) to east (right). White dashed lines denote clusters of specimens sampled from different states and provinces across this longitudinal gradient. K=2 taken as var. *rudis* versus var. *tuberculatus* ancestry, as in (45).

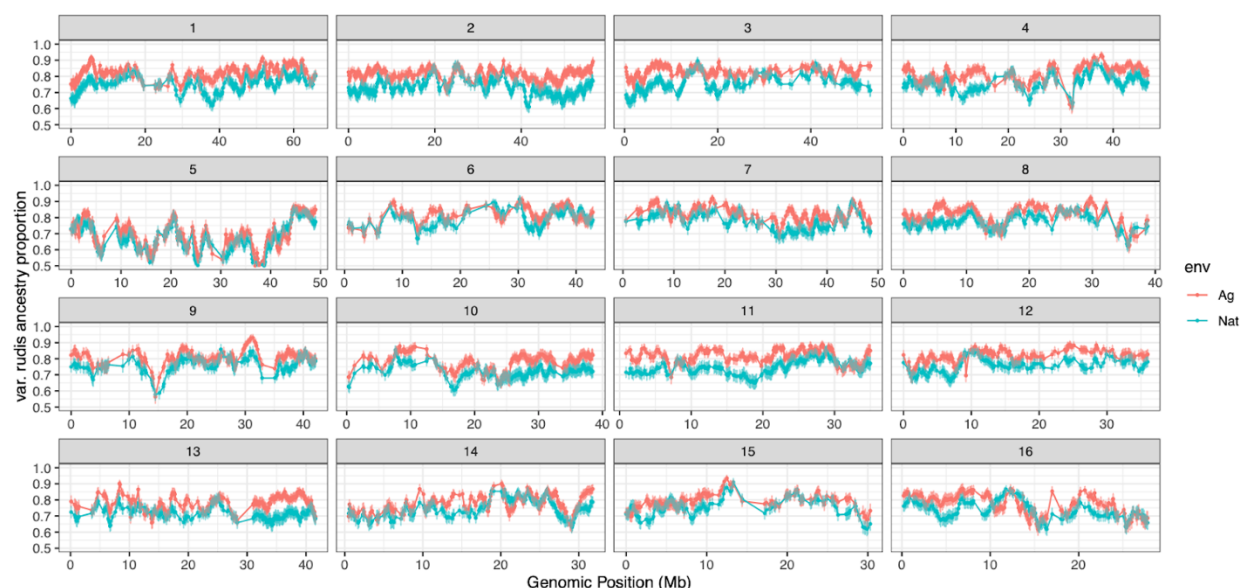

**Fig S10.** Excess of var. *rudis* ancestry in agricultural compared to natural environments, in 100 kb regions across the genome. Lines depict the mean ancestry across all populations within each environment, with error bars showing the mean 5th and 95th percentile of ancestry across populations. Fine-scale ancestry estimates were inferred with LAMP (65).

1161

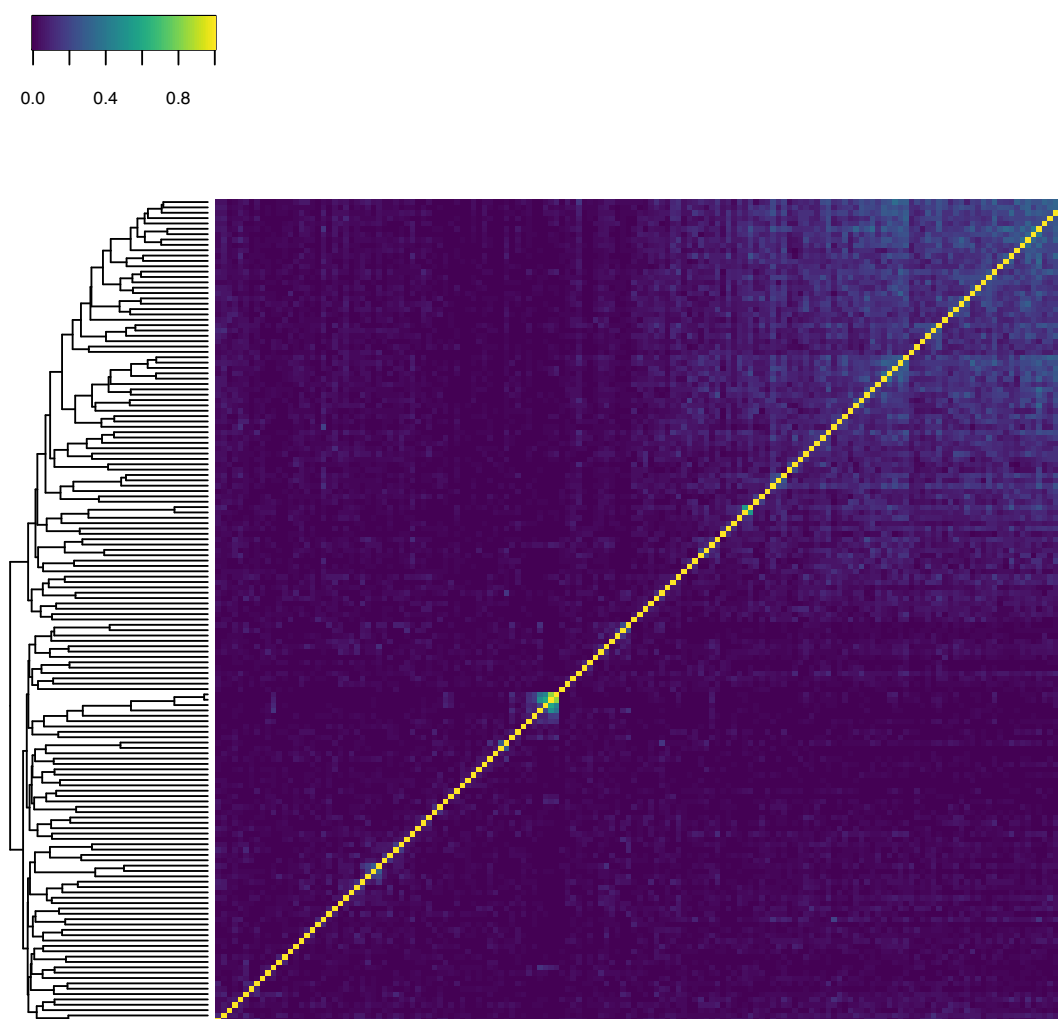

1162  
1163 **Fig S11.** Heatmap of  $r^2$  values alongside a dendrogram of the 154 agriculturally  
1164 associated SNPs identified through CMH tests across paired contemporary natural-  
1165 agricultural samples, illustrating independence among focal LD-clumped CMH outliers.  
1166  
1167  
1168  
1169

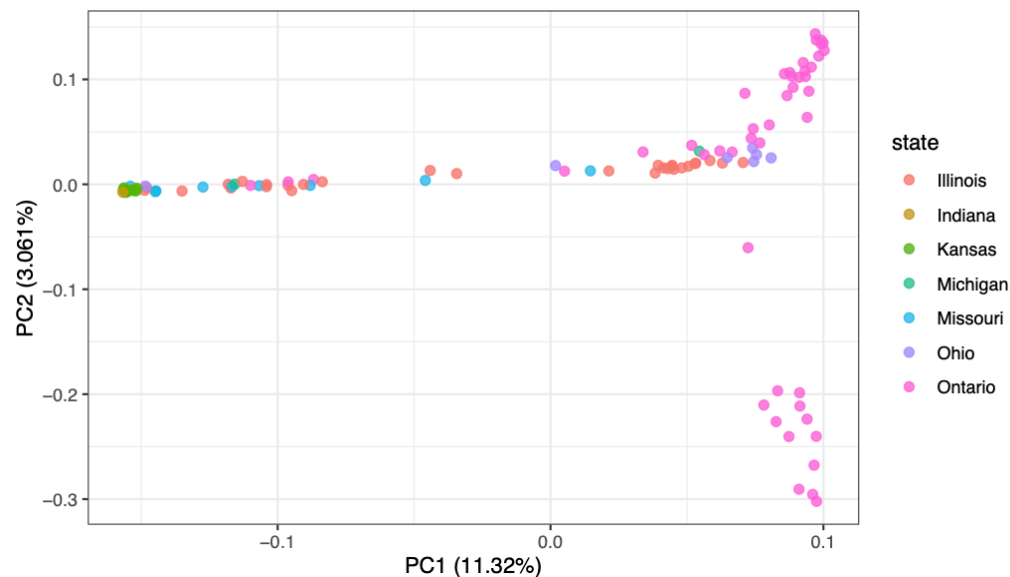

**Fig S12.** PCA of herbarium samples, colored by state/province.

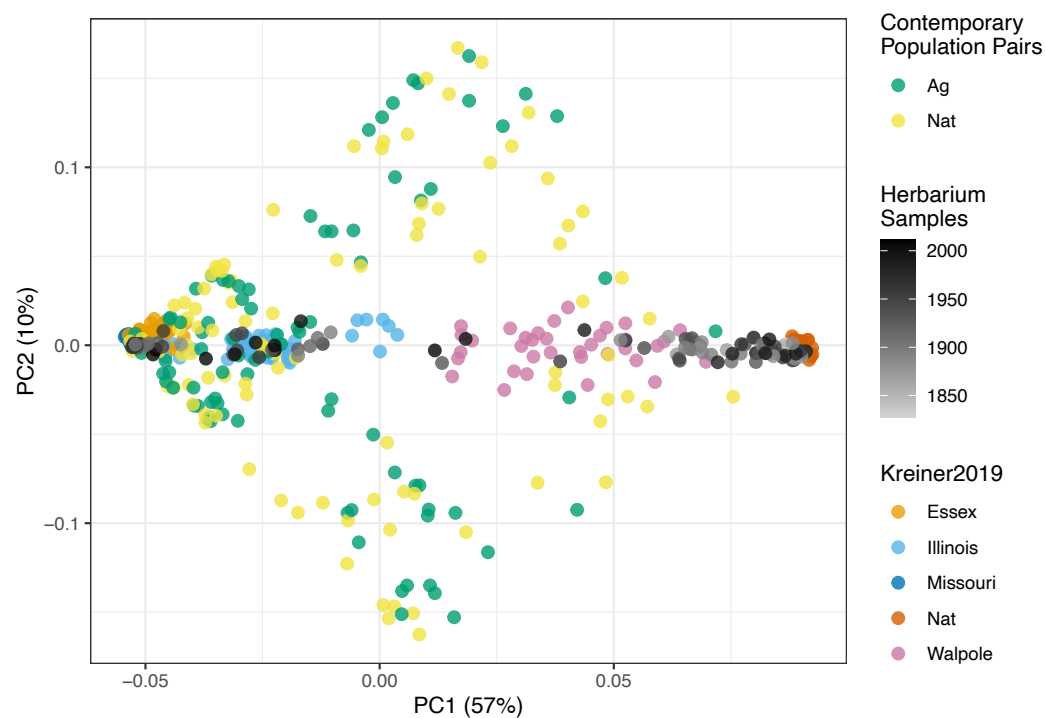

**Fig S13.** PCA of 457 *A. tuberculatus* specimens, including 108 herbarium samples along with contemporary paired populations (24) (n=187) and 21 populations from 5 geographic regions (45) (n=162).

Figure Captions



**Fig 1. Sequenced waterhemp collections through space and time.** **A)** Map of 17 contemporary paired natural-agricultural populations [n=187, collected and sequenced in Kreiner et al., 2021 (24)], along with 108 novel sequenced herbarium specimens dating back to 1828 collected across three environment types (Ag=Agricultural, Nat=Natural, Dist=Disturbed). **B)** Distribution of sequenced herbarium samples through time.

**Fig 2. Signals of contemporary agricultural adaptation, gene flow, and antagonistic selection across the genome in *A. tuberculatus*.** **A)** Results from Cochran–Mantel–Haenszel (CMH) tests for SNPs with consistent differentiation among environments across contemporary natural-agricultural population pairs. A 10% FDR threshold is indicated by the lower dashed horizontal black line, while the Bonferroni corrected p-value < 0.1 cutoff is shown by the upper dashed horizontal gray line. Red points indicate focal adaptive SNPs after aggregating linked variation ( $r^2 > 0.25$  within 1 Mb). Candidate agriculturally adaptive genes for peaks that are significant at a 10% FDR threshold shown. **B)** CMH results from the scaffold containing the most significant CMH p-value, corresponding to variants linked to the PPO210 deletion conferring herbicide resistance and to the nearby herbicide-targeted gene *ALS*. **C)** Distribution of  $F_{ST}$  values between all agricultural and natural samples for ~3 million genome-wide SNPs (minor allele frequency > 0.05). Vertical lines indicate  $F_{ST}$  values for the 10 candidate genes named in A. **D)** Population-level frequencies of six common herbicide resistance alleles across geographically paired agricultural and natural habitats sampled in 2018 (pairs connected by horizontal lines). The first four columns are nonsynonymous variants in *ALS* and *EPSPS*, followed by *EPSPSamp* (a 10 Mb-scale amplification that includes *EPSPS*), and lastly, an in-frame single-codon deletion in *PPO*. Estimates of per-migrant natural cost: agricultural benefit ratio (C:B) is shown in the top right corner for the three resistance alleles with a significant (\*) allele frequencies differences (AFA) across environment types.

**Fig 3. Genomic signatures of agricultural adaptation through time.** **A)** Agricultural allele frequency trajectories for each 154 focal SNPs, in agricultural and disturbed habitats (left), and natural habitats (right). Trajectories colored by the empirical quantile of frequency change in agricultural and disturbed habitats. Transparent lines indicate those with non-significant evidence of selection at  $\alpha=0.05$  after FDR=10% correction. **B)** The distribution of selective strengths on agricultural alleles in natural (dark gray) and agricultural/disturbed (light gray) habitats between 1870 and 2018. **C)** Environment-specific agricultural allele frequency trajectories, before and after the start of agricultural intensification in 1960 (vertical dashed line). Large circles represent moving averages (over both loci and individuals) of allele frequencies, whereas dots represent raw genotype data for each locus and sample from which the allele frequency trajectory is estimated. Cropland use per capita in North America data from (1), rescaled by use in 1600, to reflect intensity of agricultural practices. **D)** The trajectory of alleles at known herbicide resistance loci through time, fit by logistic regression for each of the biallelic resistance alleles present in our contemporary data (excluding *EPSPSamp* with its complex allelic structure). Dots represent genotypes for each historical and contemporary sample at each herbicide resistance locus. 95% credible interval of the maximum likelihood estimate of selection between 1960-2018 provided in the legend for each resistance allele.

**Fig 4. Temporal shifts in the distribution of var. *rudis* ancestry have facilitated polygenic agricultural adaptation.** **A)** Longitudinal clines in individual-level var. *rudis* ancestry over three timespans, illustrating the expansion of var. *rudis* ancestry eastwards over the last two centuries. **B)** The distribution of individual-level var. *rudis* ancestry by state and through time, illustrating state-specific changes in ancestry. Vertical lines represent first, second, and third quantiles of ancestry within each timespan and state. Timespans indicated in (A). No individuals were collected from Kansas between 1828-1920. **C)** Increasing sorting of individual-level var. *rudis* ancestry into agricultural environments on contemporary timescales. **D)** Environment-specific metrics of selection (CMH p-value and cross-population extended haplotype homozygosity (XPEHH)) across the genome in 100 kb windows positively correlate with var. *rudis* ancestry in agricultural, but not natural habitats (XPEHH by Environment:  $F=9.34$ ,  $p=0.002$ ; CMH by Environment:  $F=99.70$ ,  $p < 10^{-16}$ ).
